# Supplementary material for: Live reef fish displaying physiological evidence of cyanide poisoning are still traded in the EU marine aquarium industry
Source: PubMed Central journal article supplement (PMC5529361; doi:10.1038/s41598-017-04940-x), 2017-07-26
Supplement: 41598_2017_4940_MOESM1_ESM.pdf [file 41598_2017_4940_MOESM1_ESM.pdf]

**Live reef fish displaying physiological evidence of cyanide poisoning are still traded in the EU marine aquarium industry**

Marcela C.M. Vaz<sup>1,2</sup>, Valdemar I. Esteves<sup>2</sup>, Ricardo Calado<sup>1\*</sup>

<sup>1</sup> Departamento de Biologia & CESAM, Universidade de Aveiro, Campus de Santiago, 3810-193 Aveiro, Portugal.

<sup>2</sup> Departamento de Química & CESAM, Universidade de Aveiro, Campus de Santiago, 3810-193 Aveiro, Portugal.

\*Corresponding author: Ricardo Calado

Phone: +351 234370779

E-mail: rjcalado@hotmail.com

**Supplementary Figure S1** - Chromatograms performed using HPLC to screen for the presence of  $\text{SCN}^-$  in seawater used to depurate live reef fish traded for marine aquariums. All details concerning each chromatogram are summarized in Supplementary Table S1.

## Chromatograms of $\text{SCN}^-$ Standard Solutions

S1a

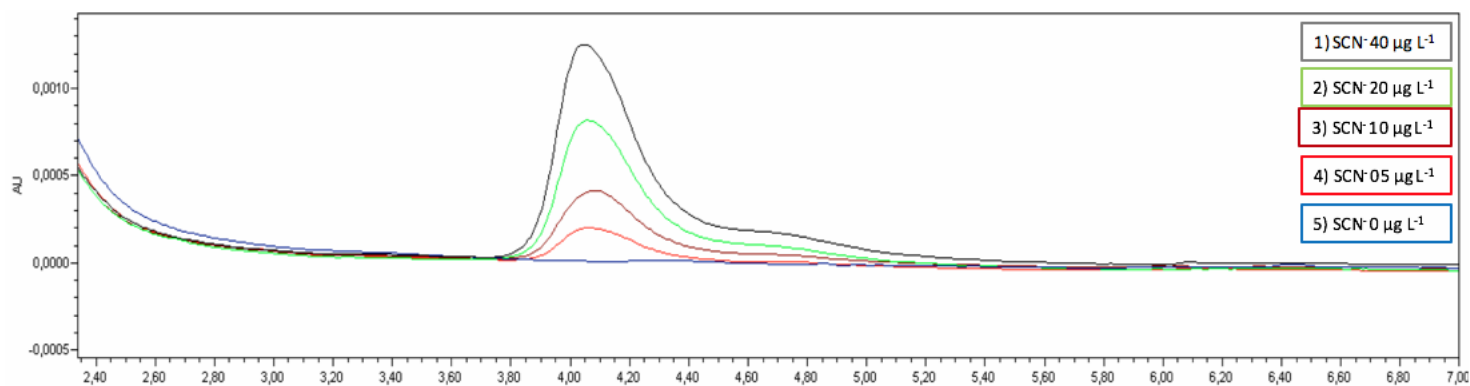

S1b

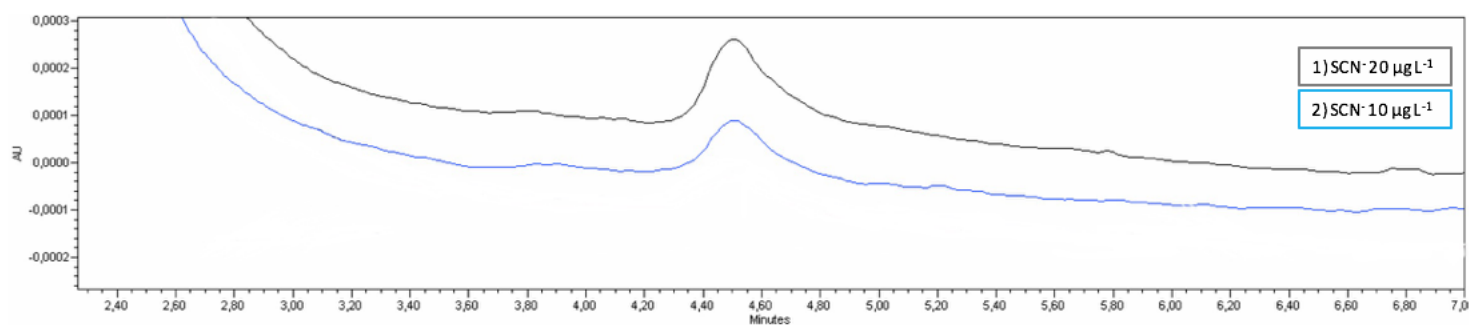

# Chromatograms tested positive for SCN<sup>-</sup>

S1c

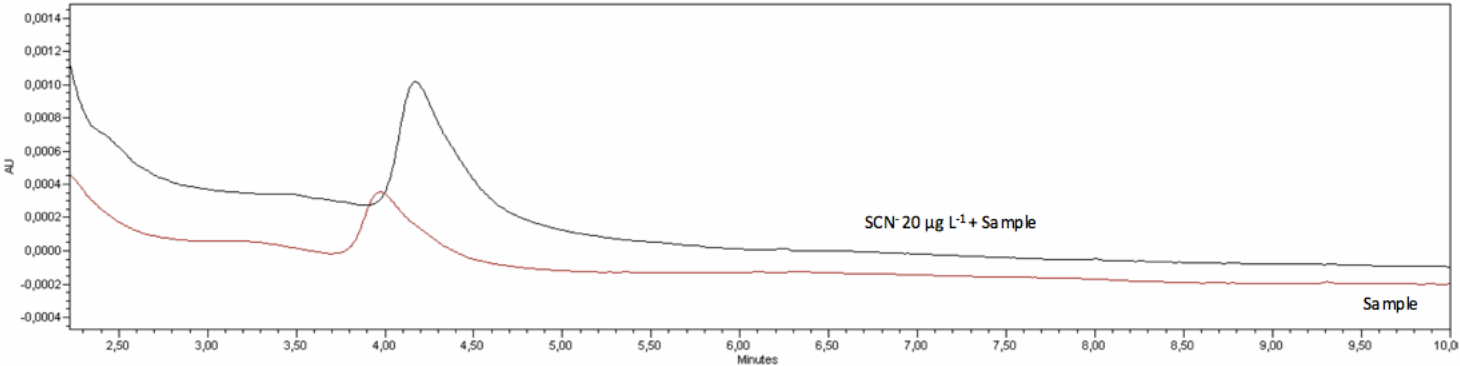

S1d

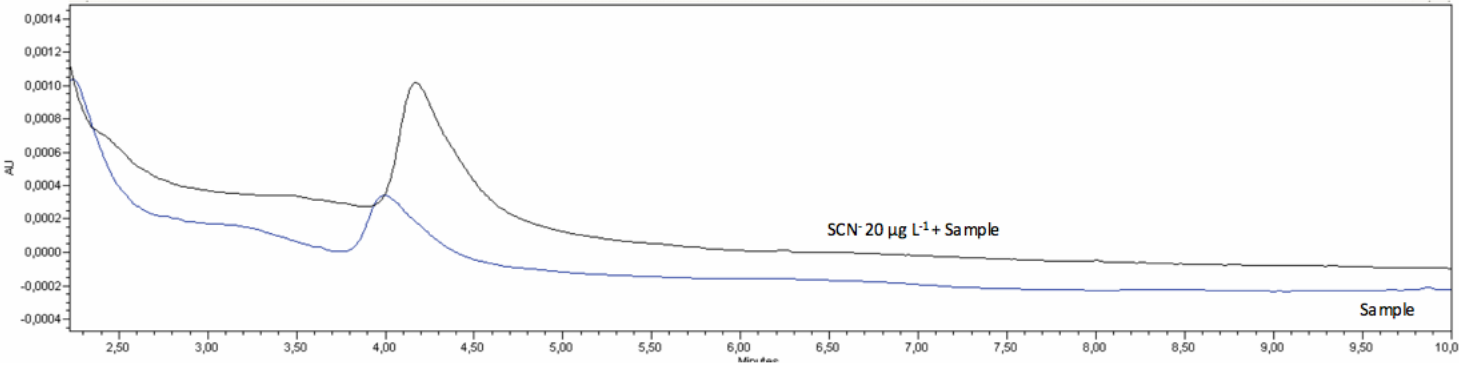

S1e

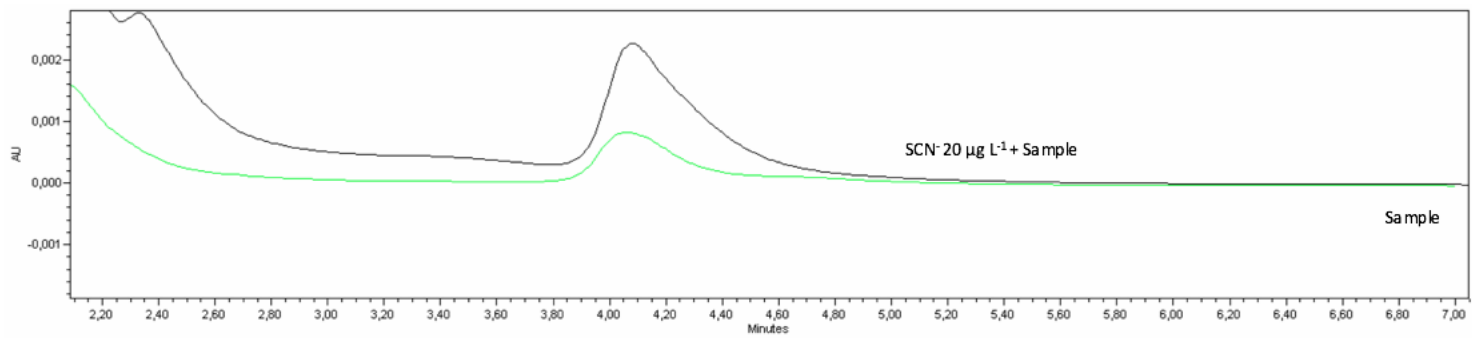

S1f

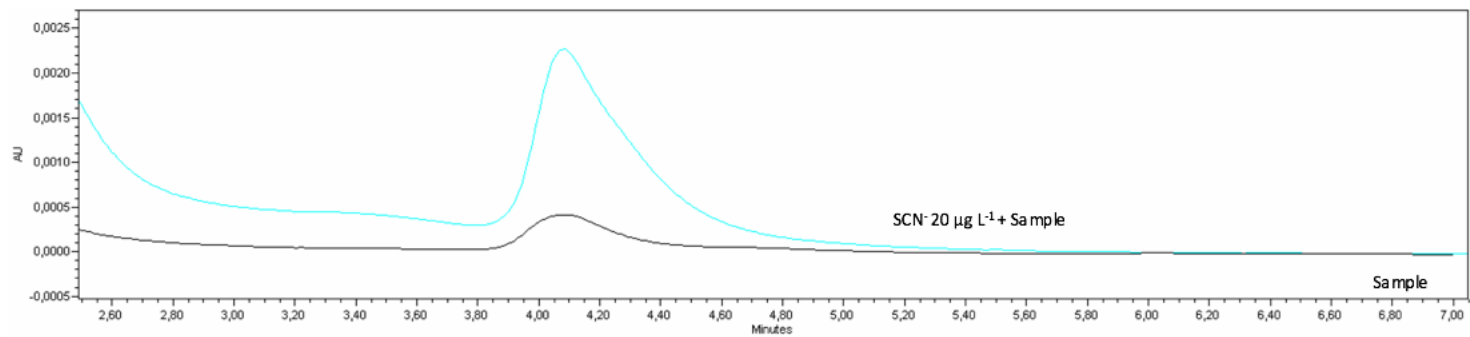

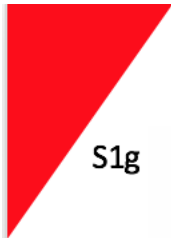

S1g

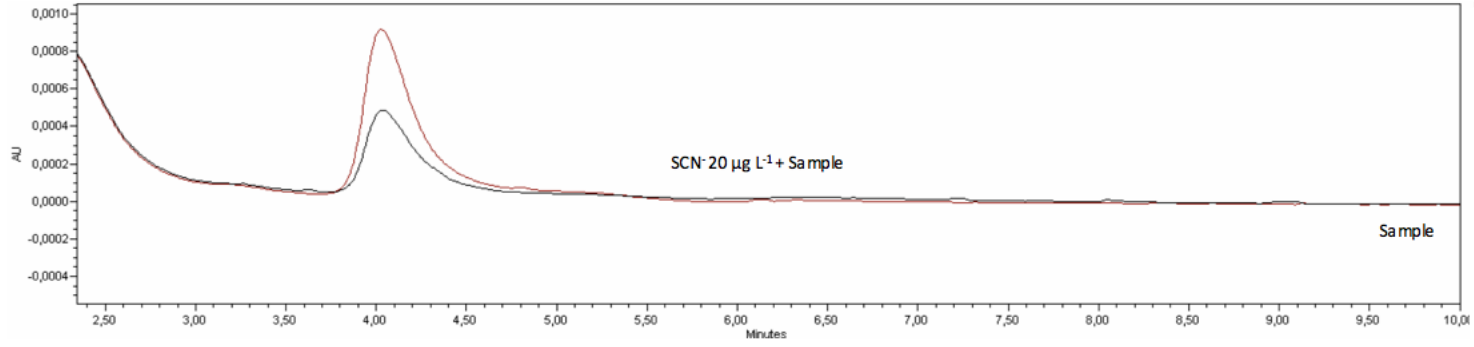

S1h

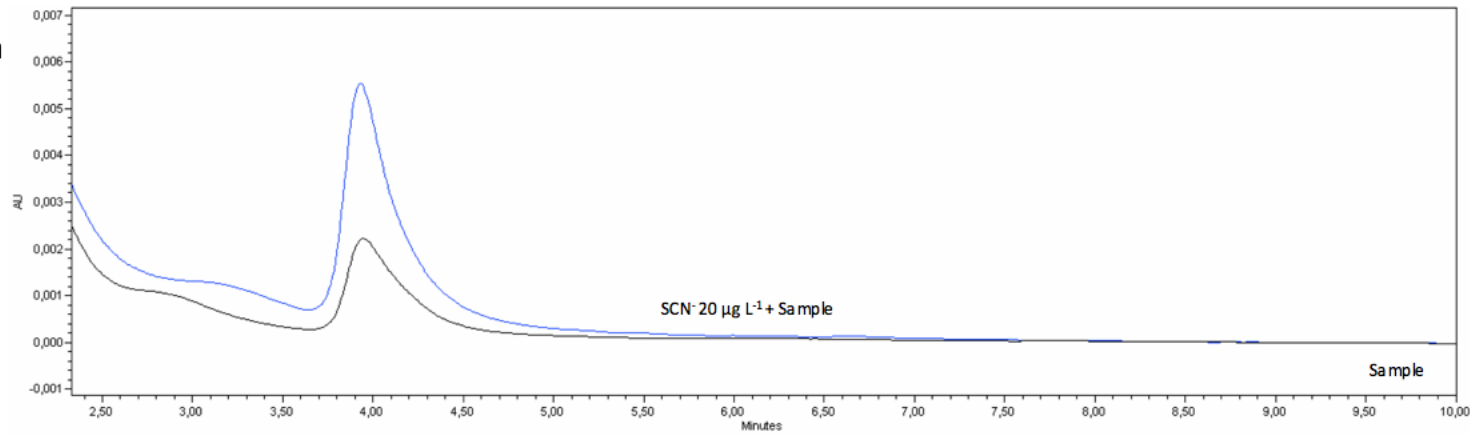

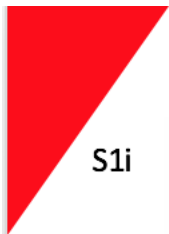

S1i

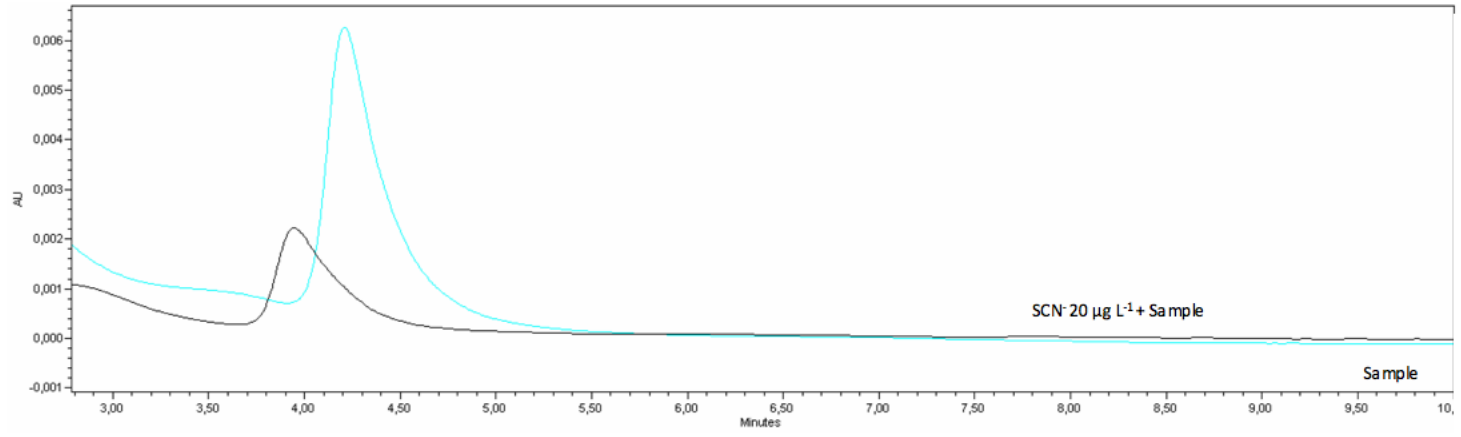

S1j

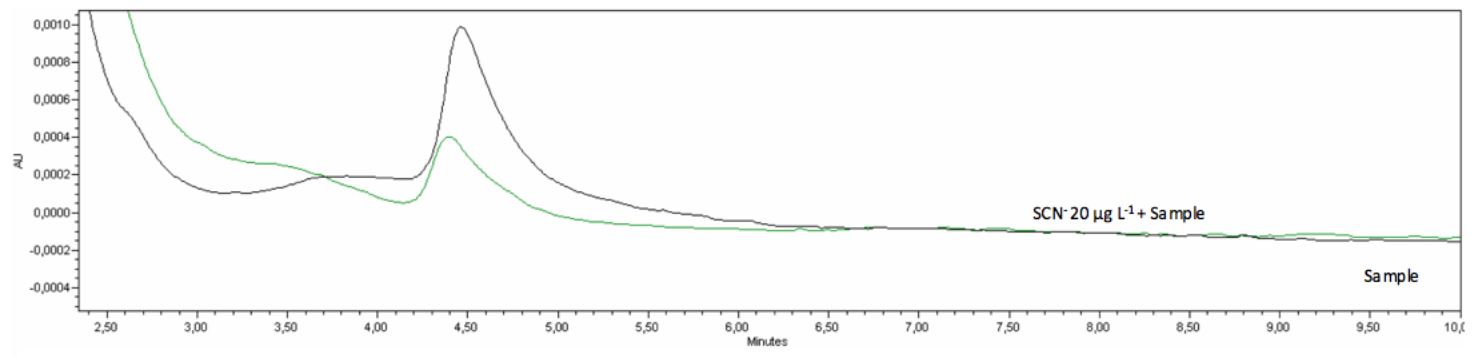

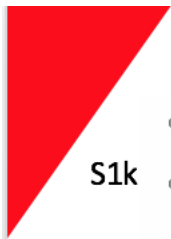

S1k

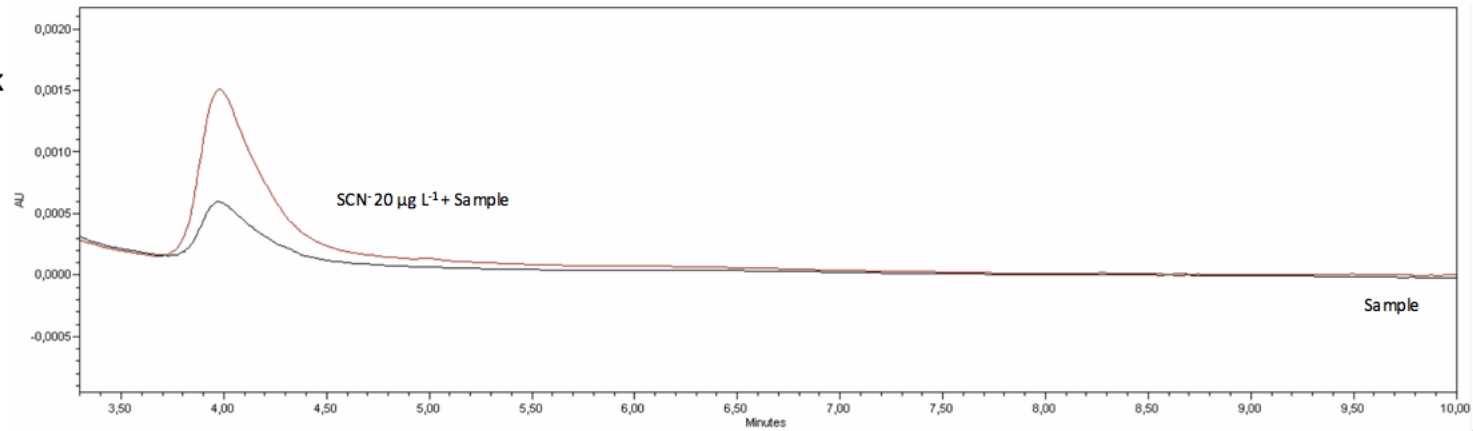

S1l

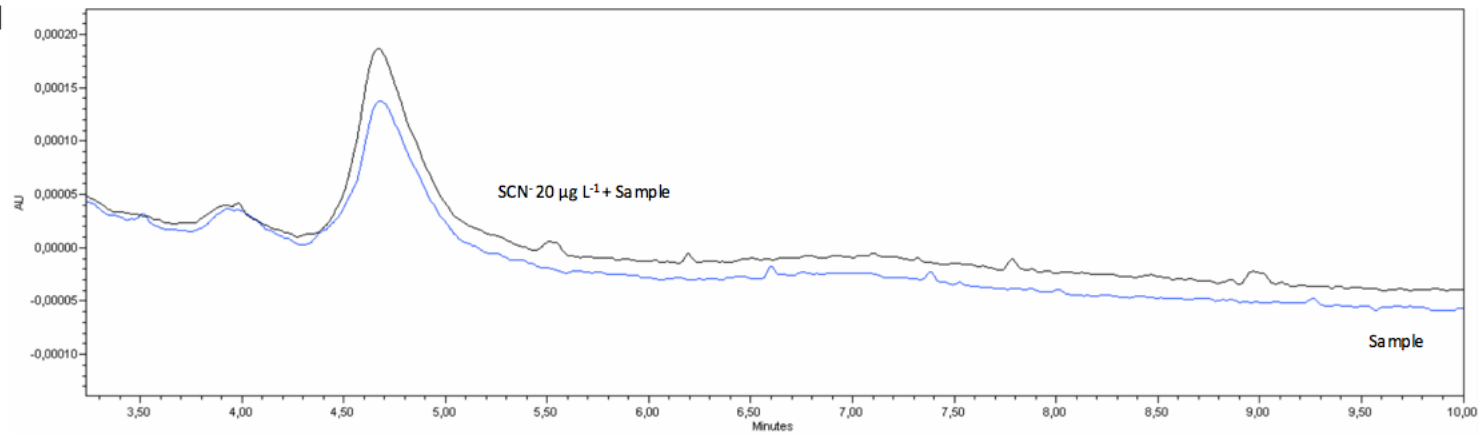

# Chromatograms tested negative for $\text{SCN}^-$ \* For concentrations above $\text{SCN}^- 10 \mu\text{g L}^{-1}$

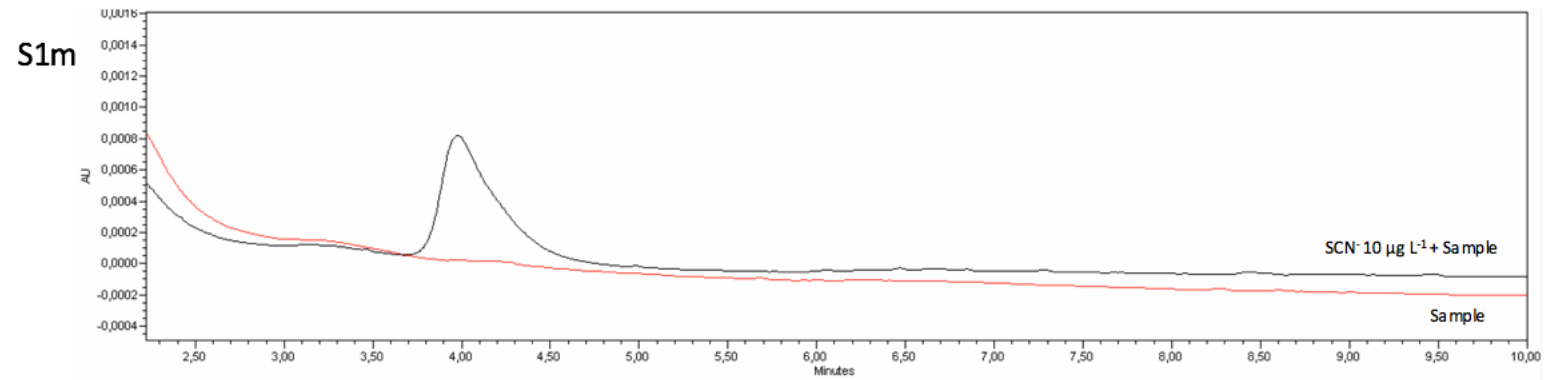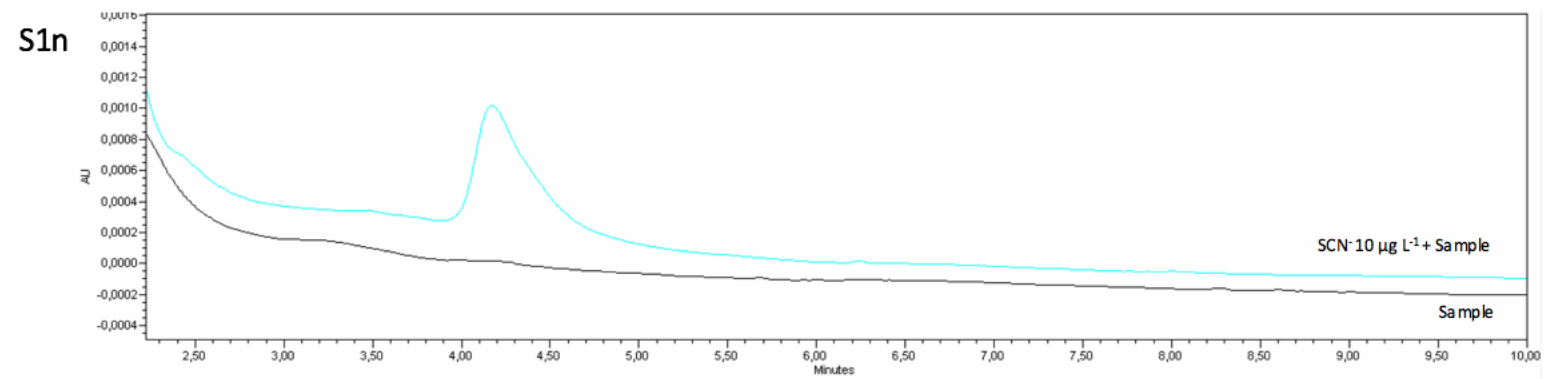



S1o

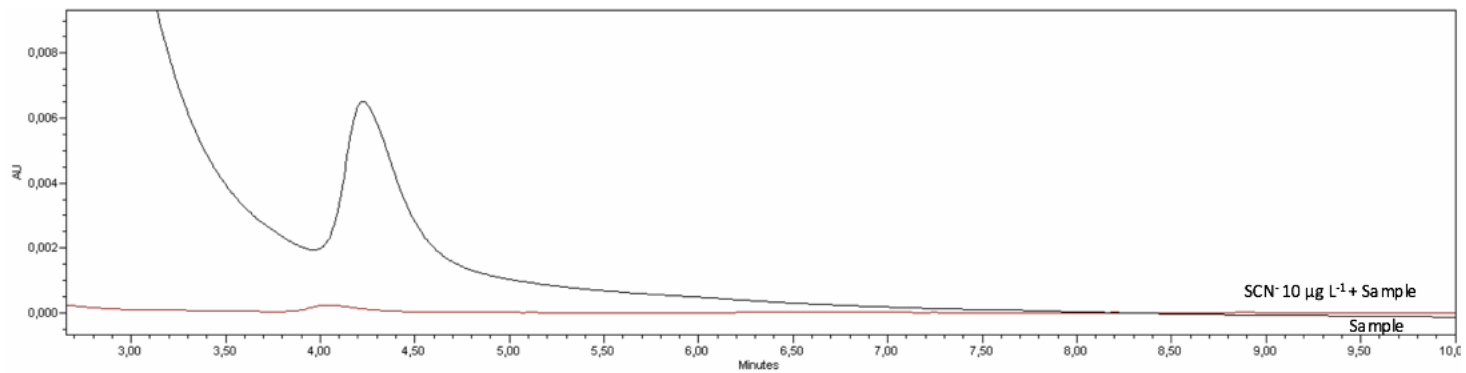

S1p

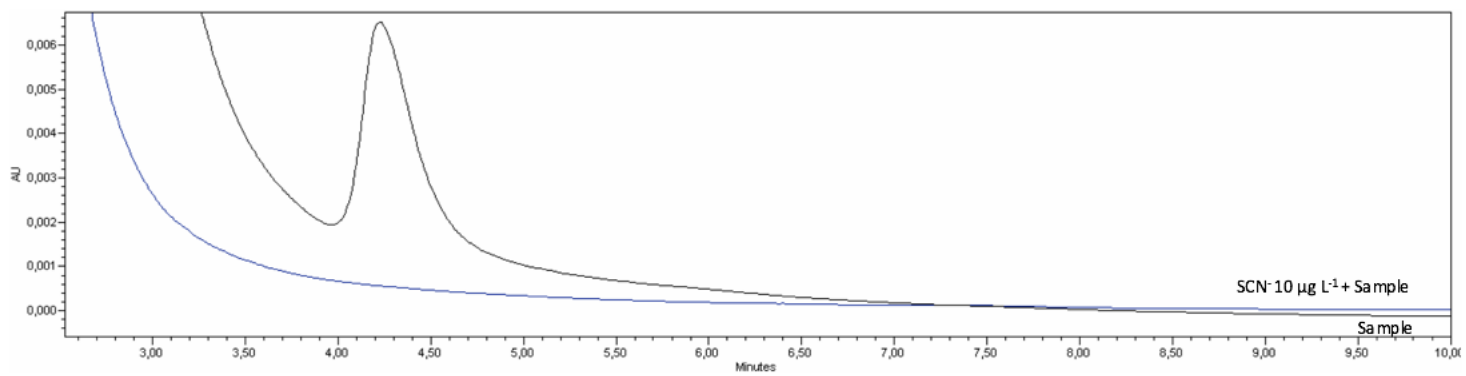

S1q

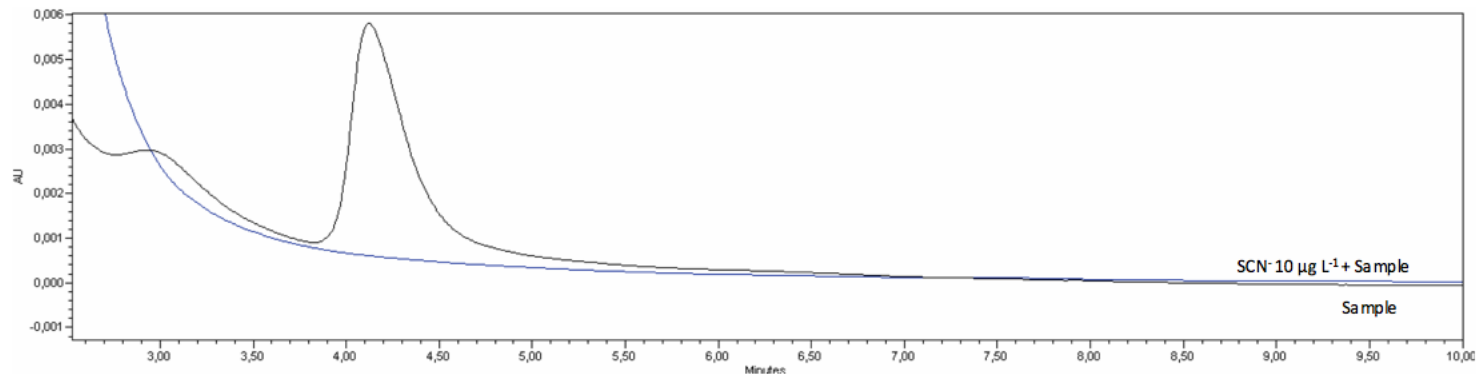

S1r

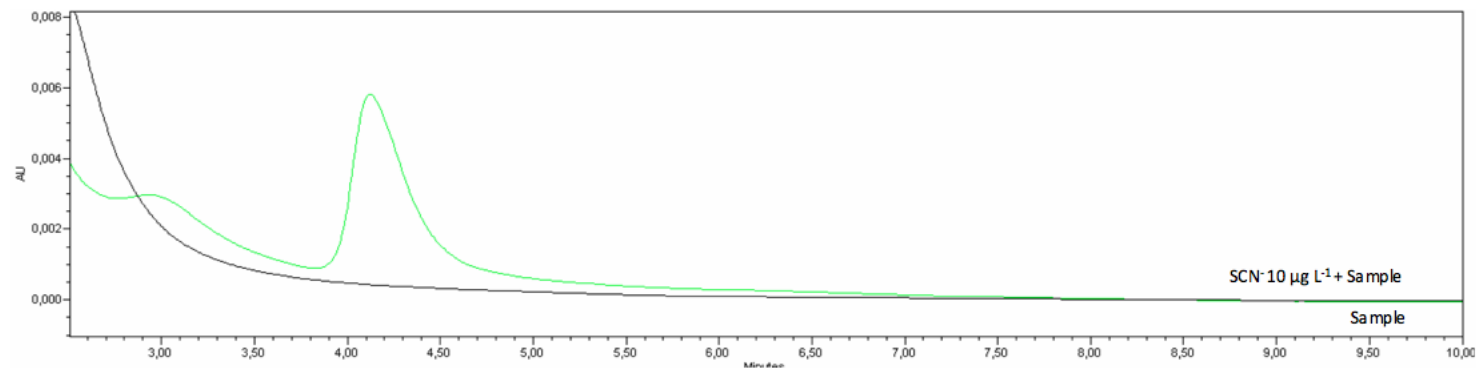

S1s

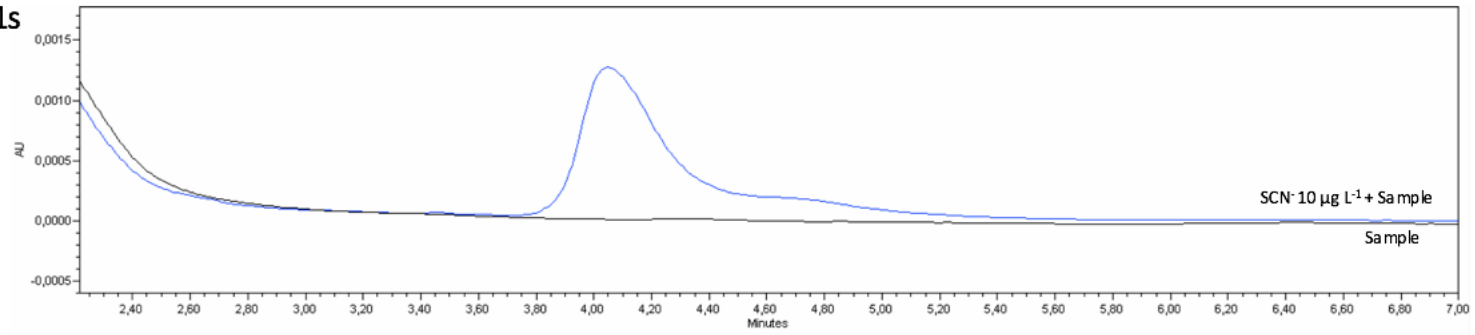

S1t

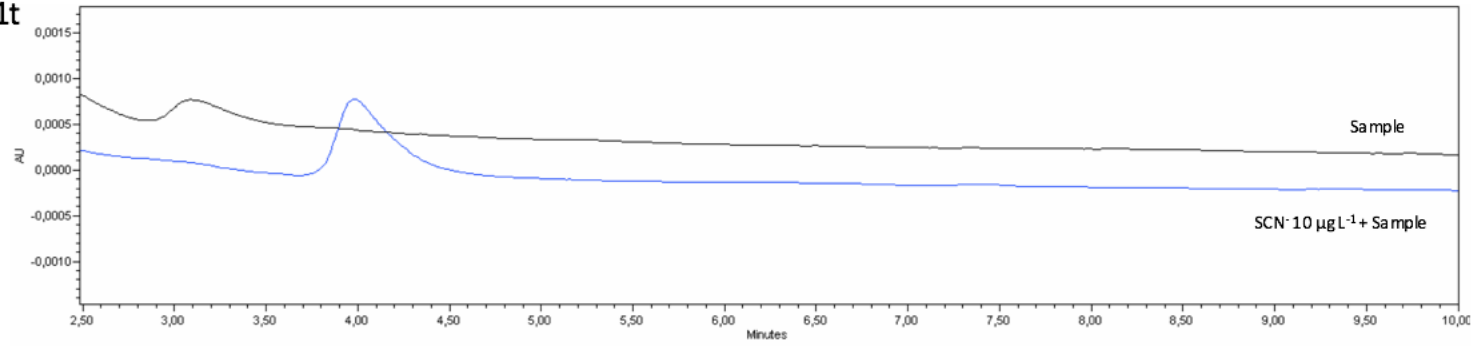

S1u

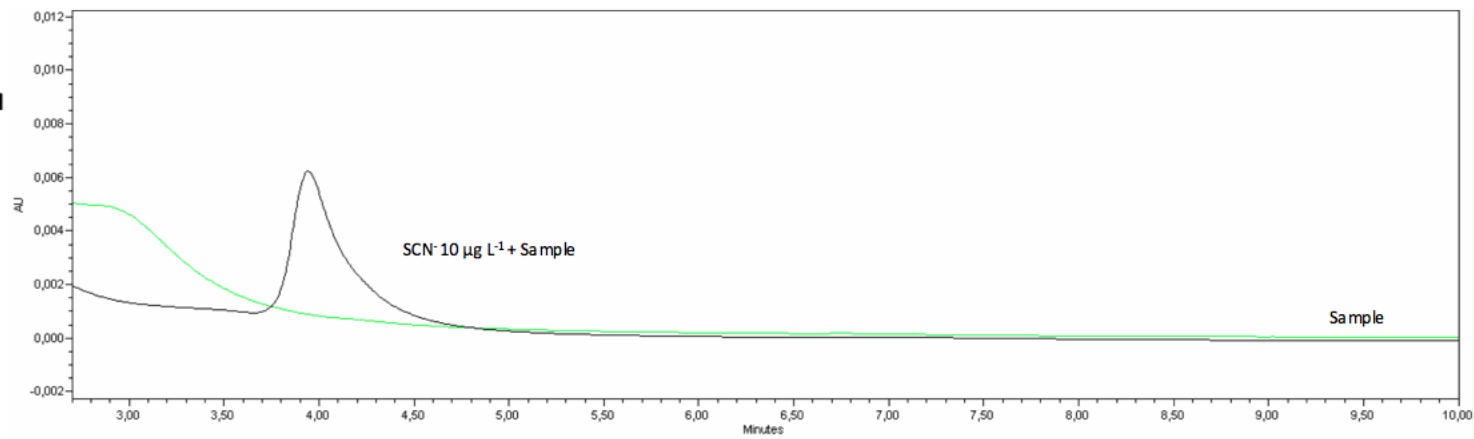

S1v

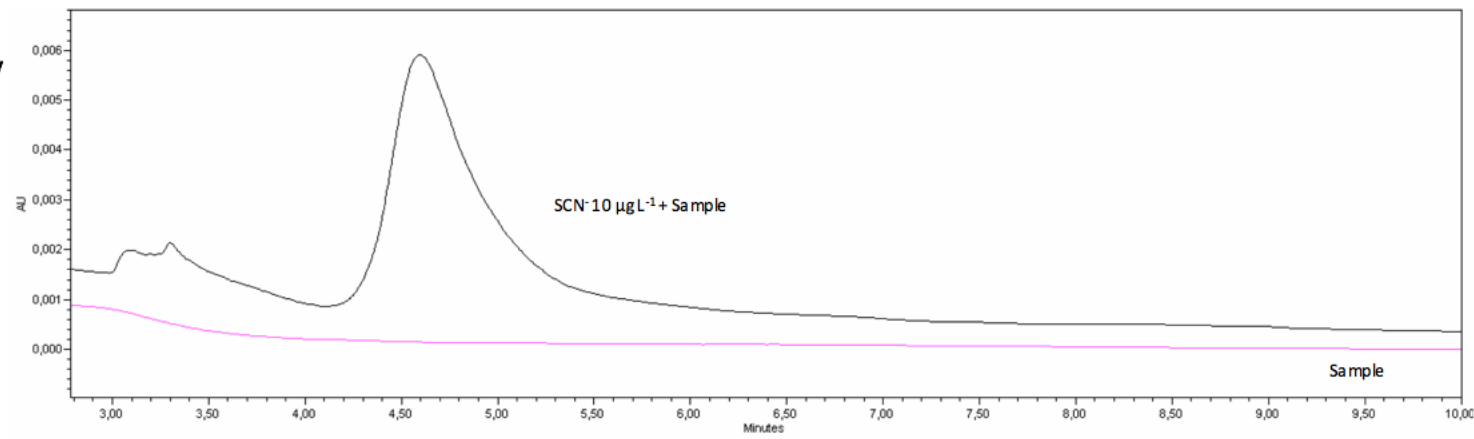

S1w

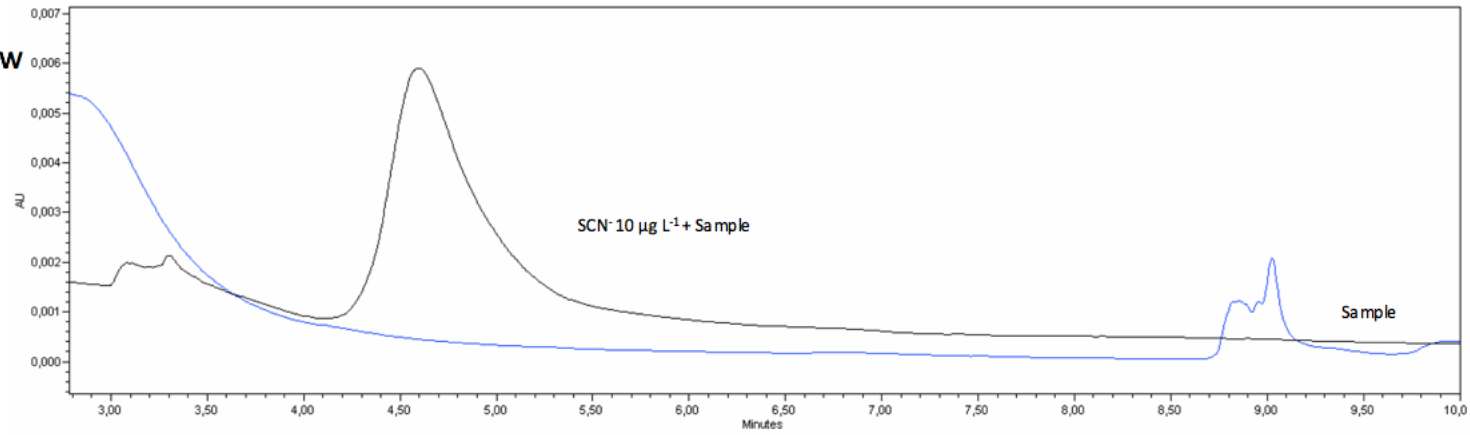

S1x

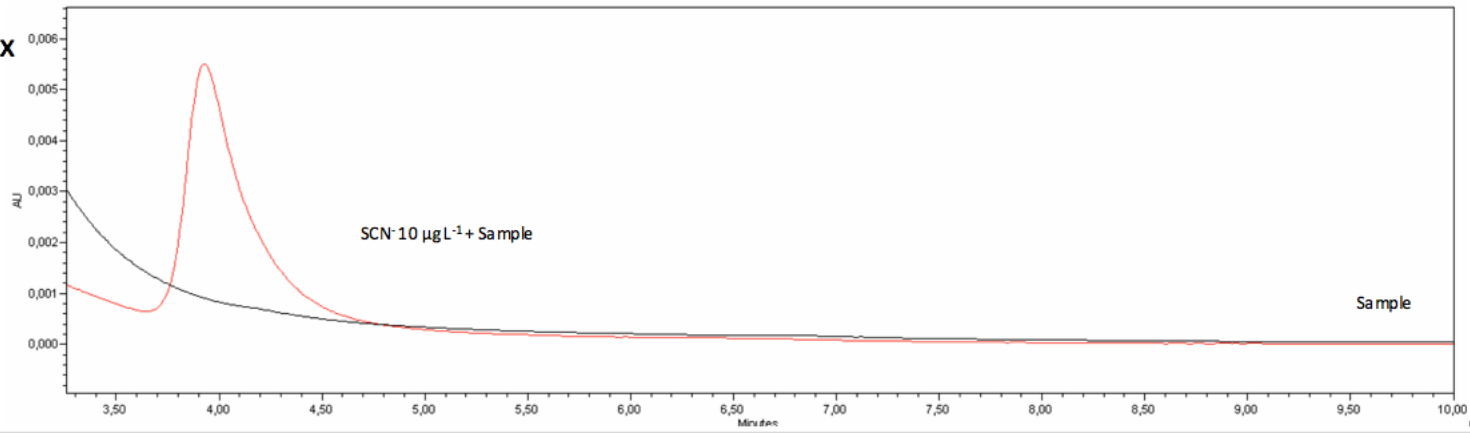

S1y

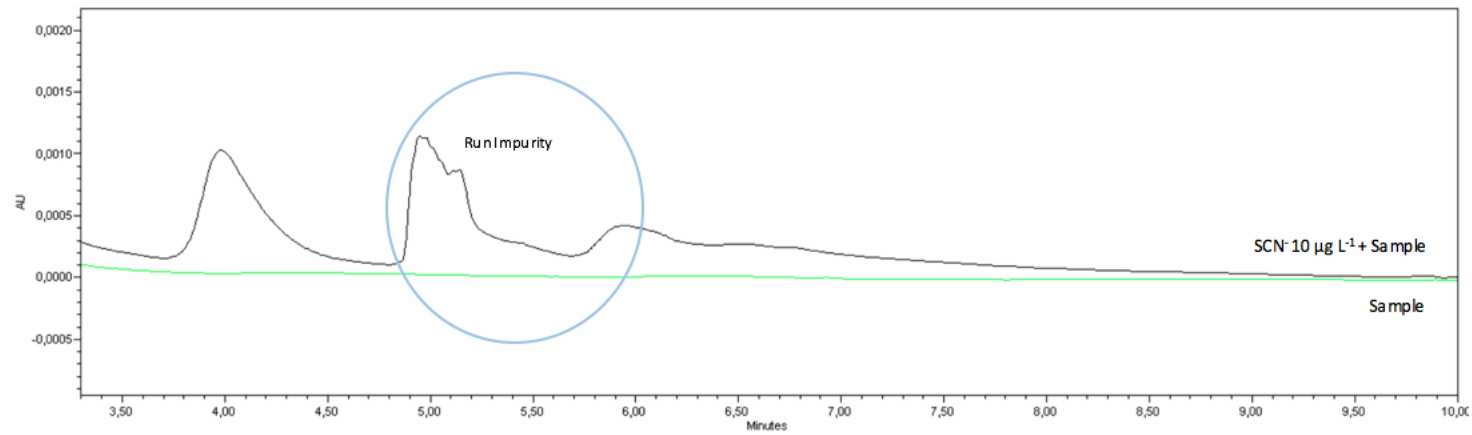

S1z

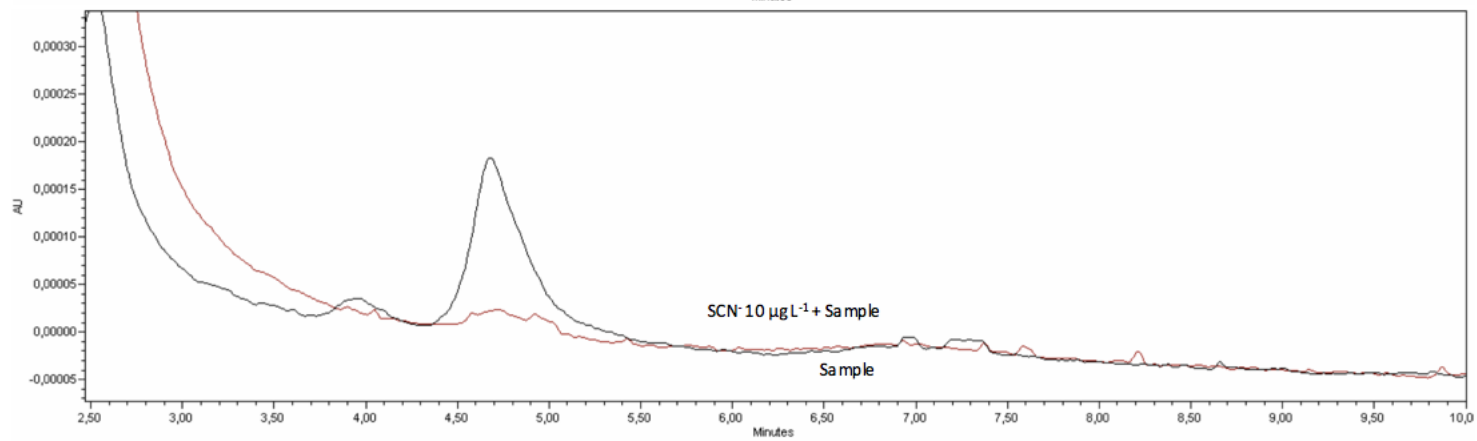

S1aa

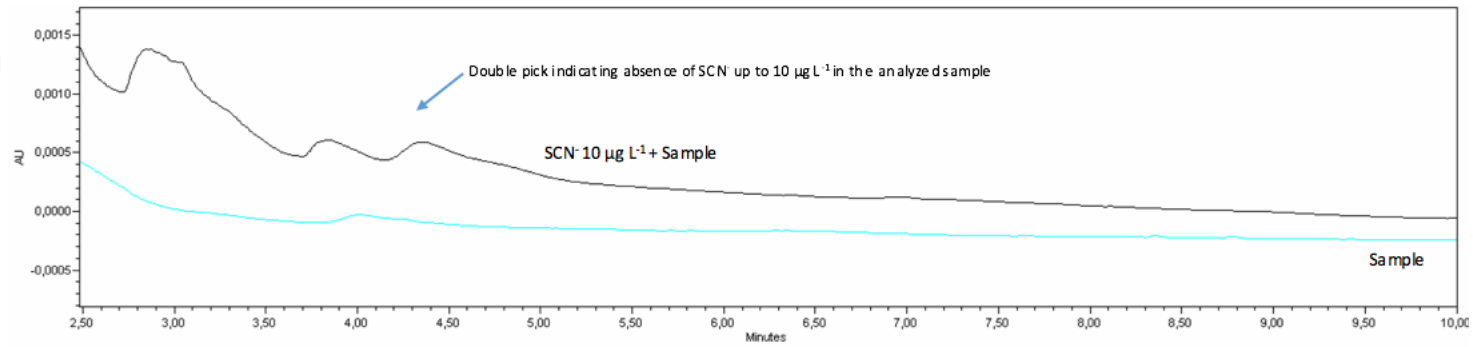

S1ab

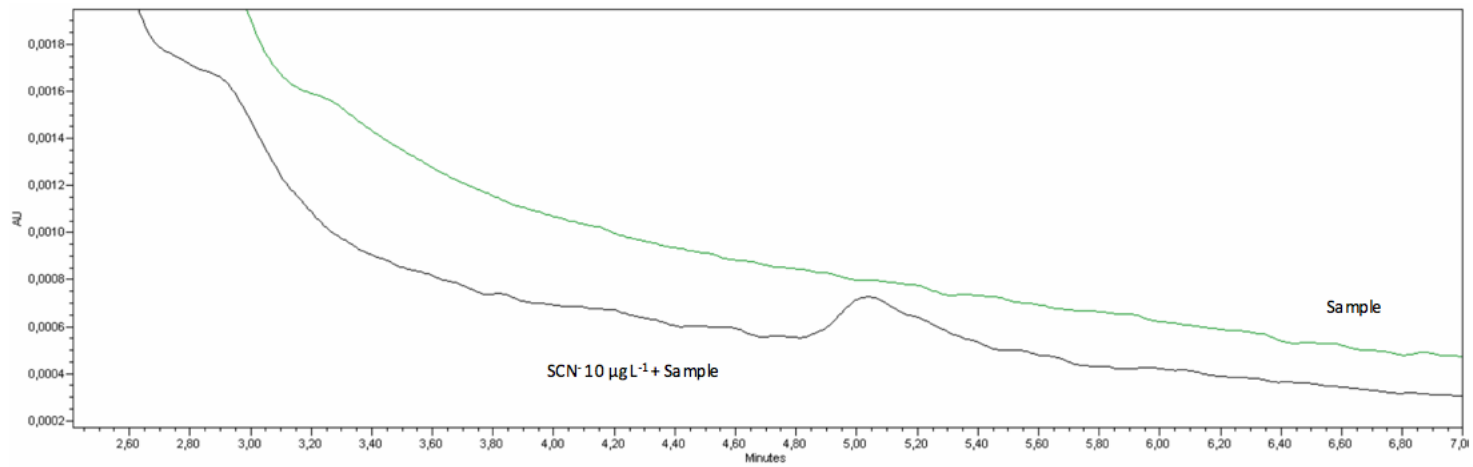

S1ac

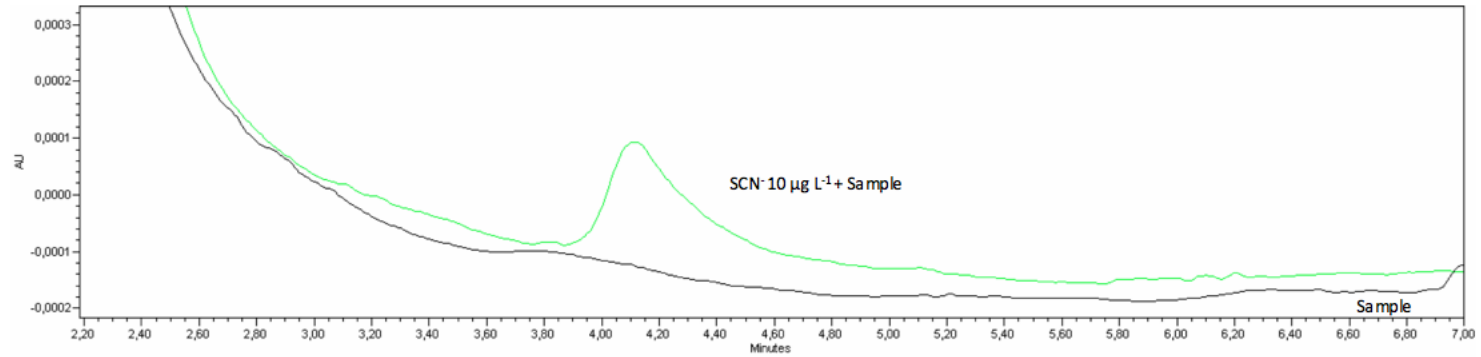

S1ad

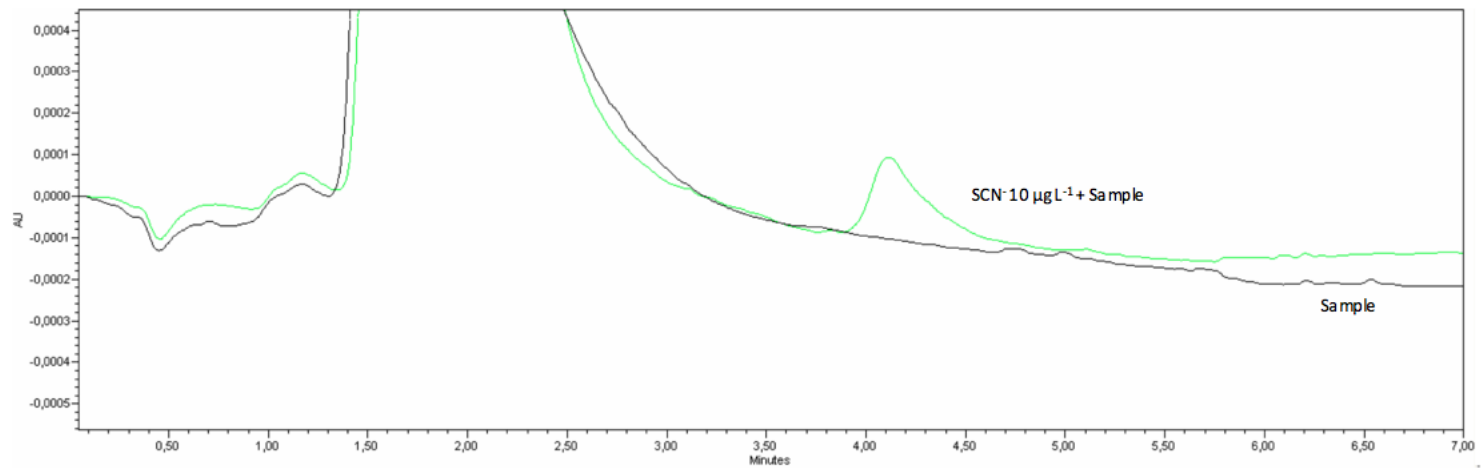



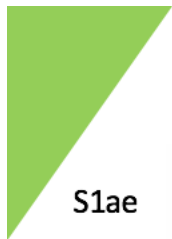

S1ae

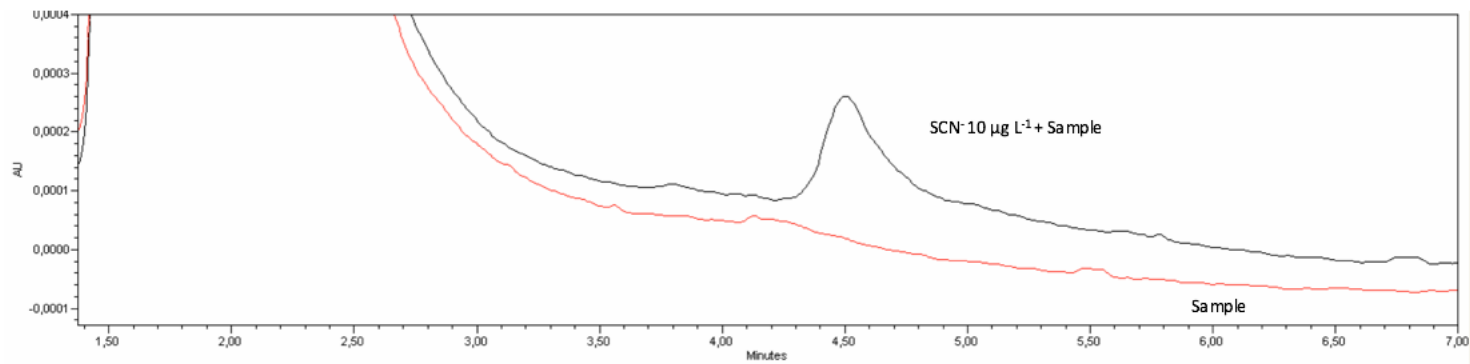

S1af

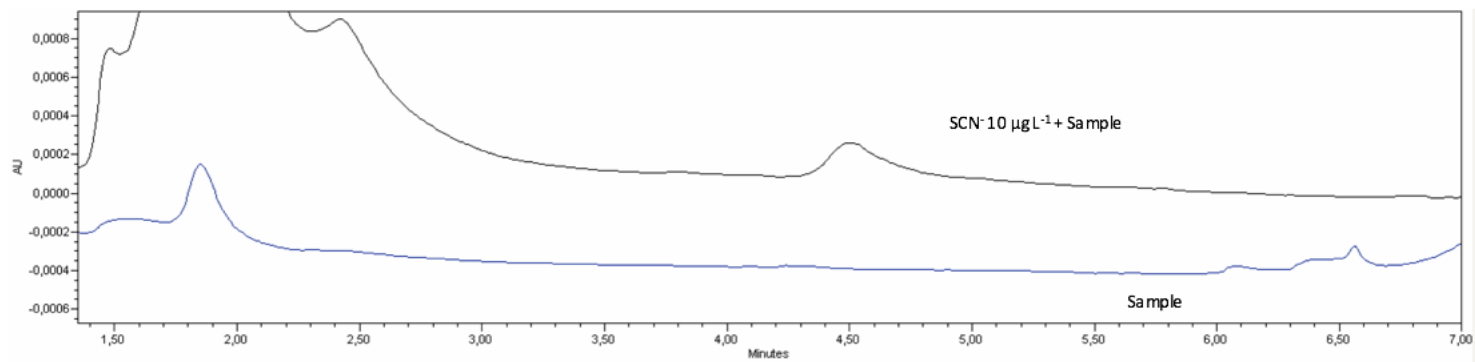

S1ag

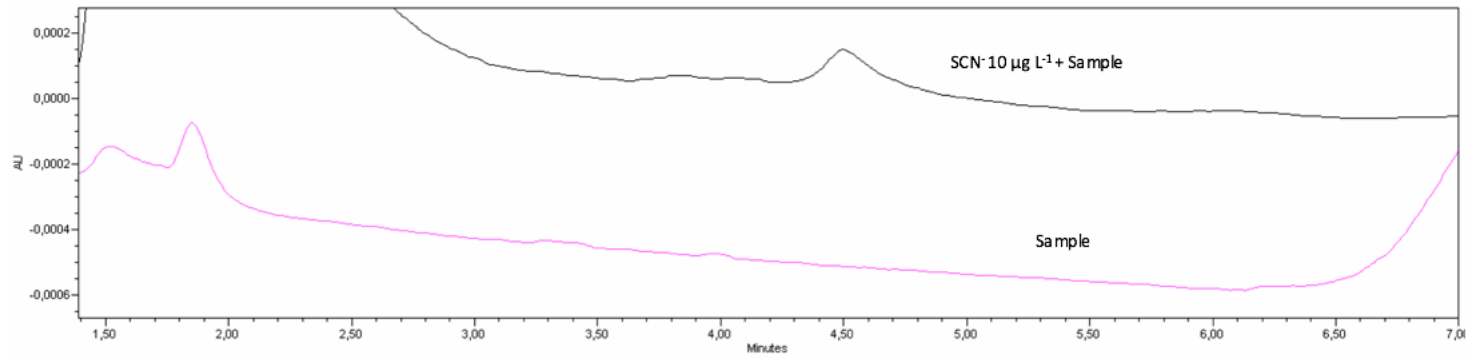

S1ah

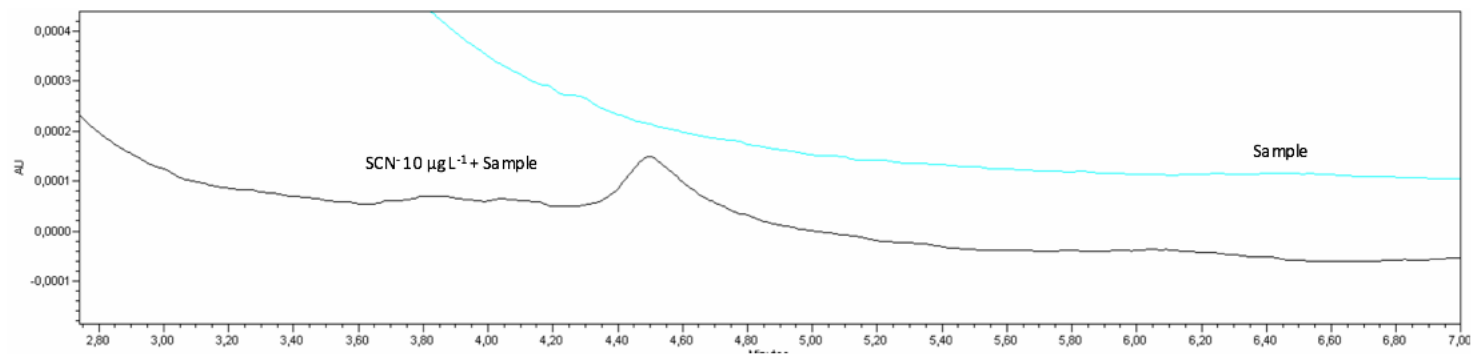

S1ai

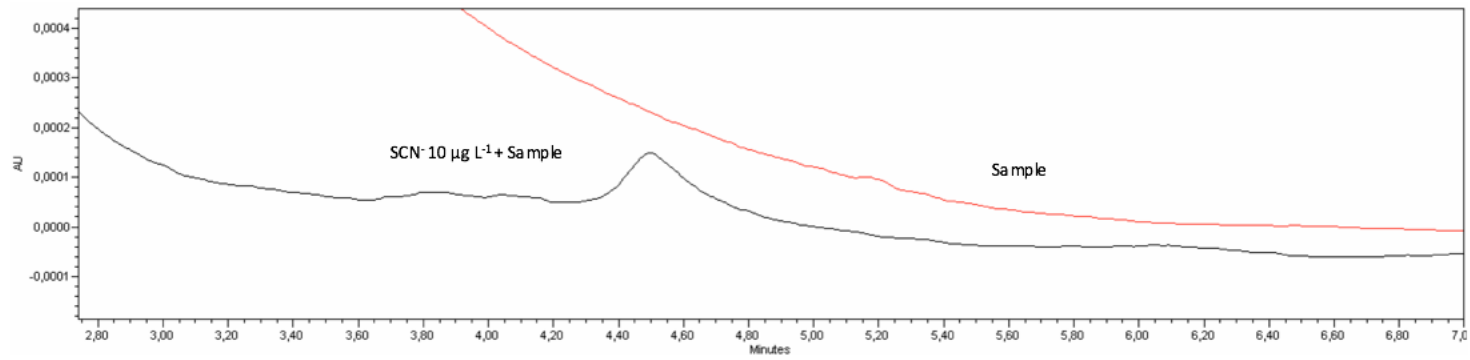

S1aj

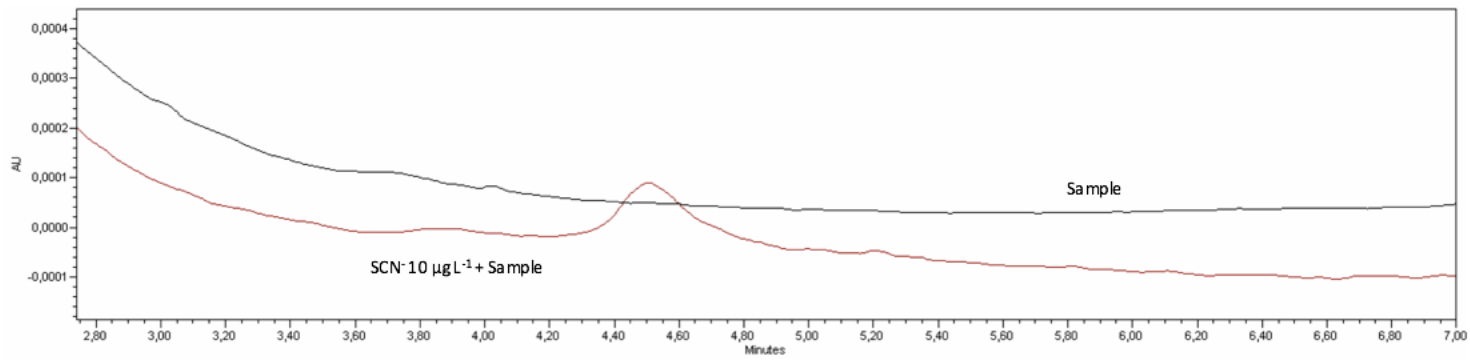

S1ak

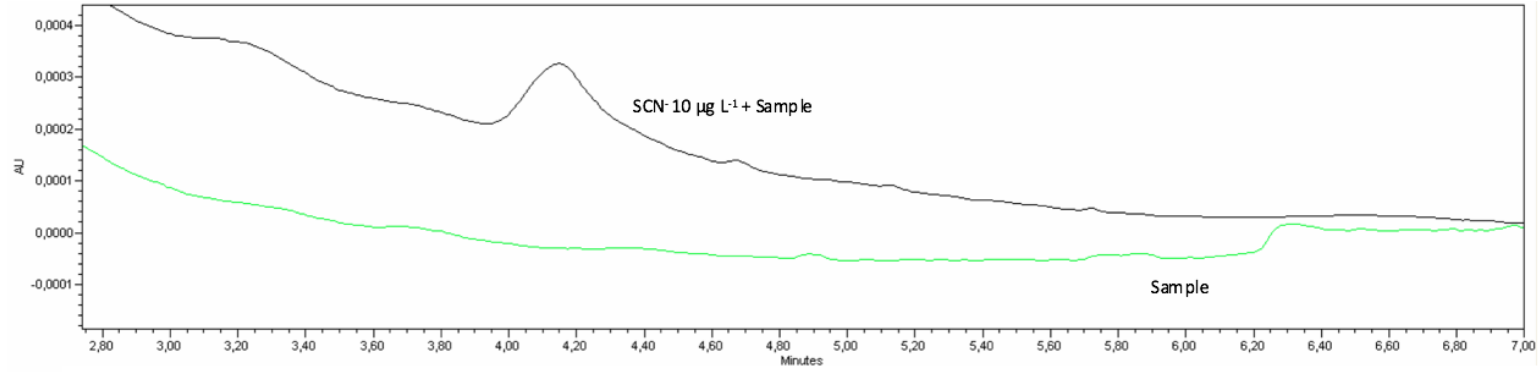

S1al

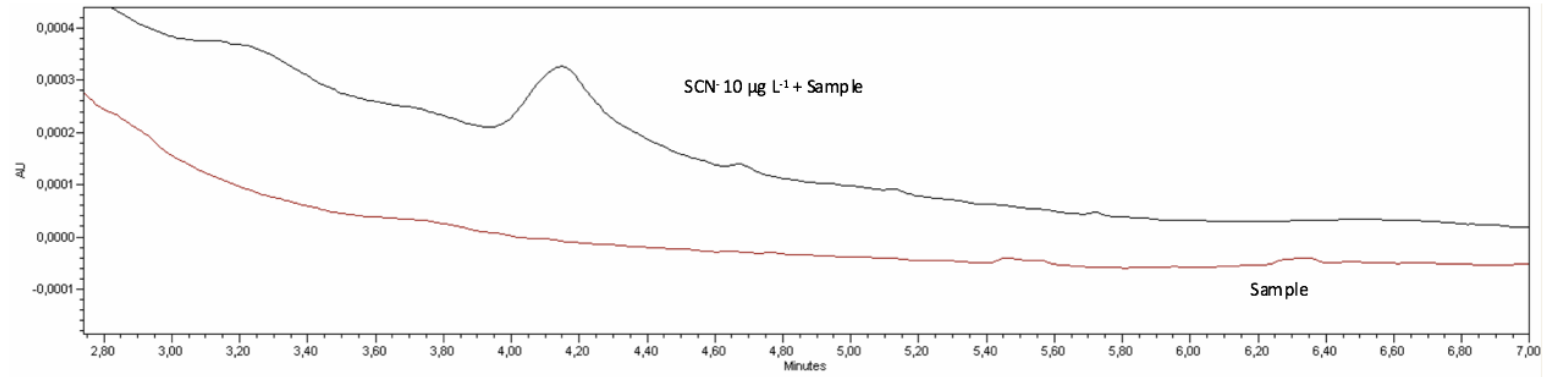

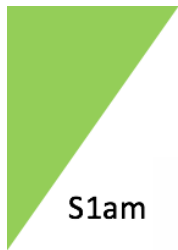

S1am

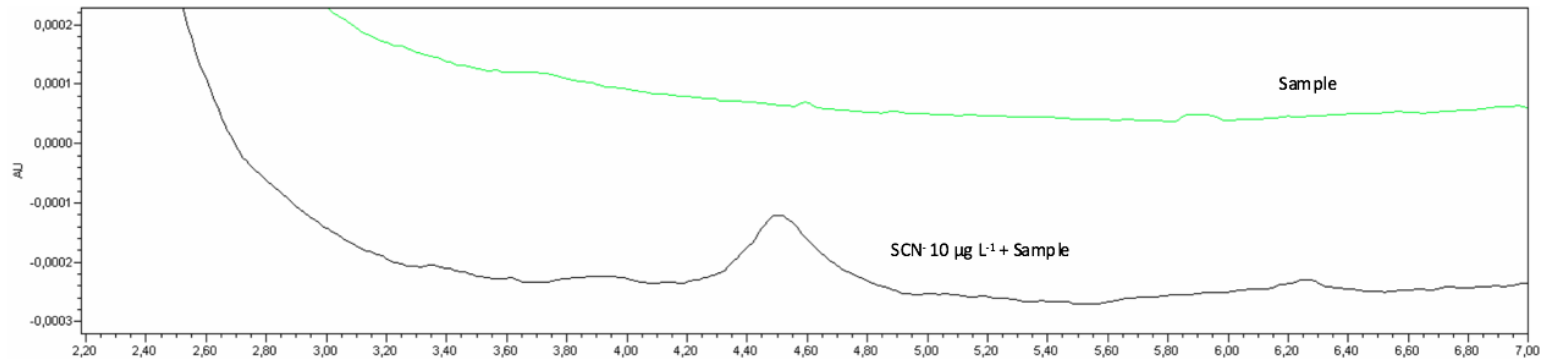

S1an

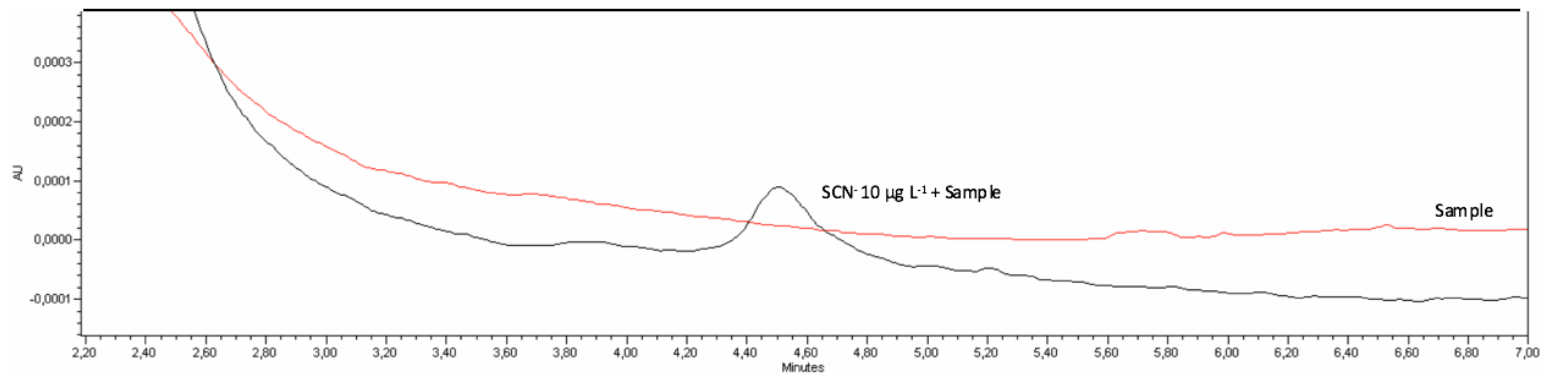

S1ao

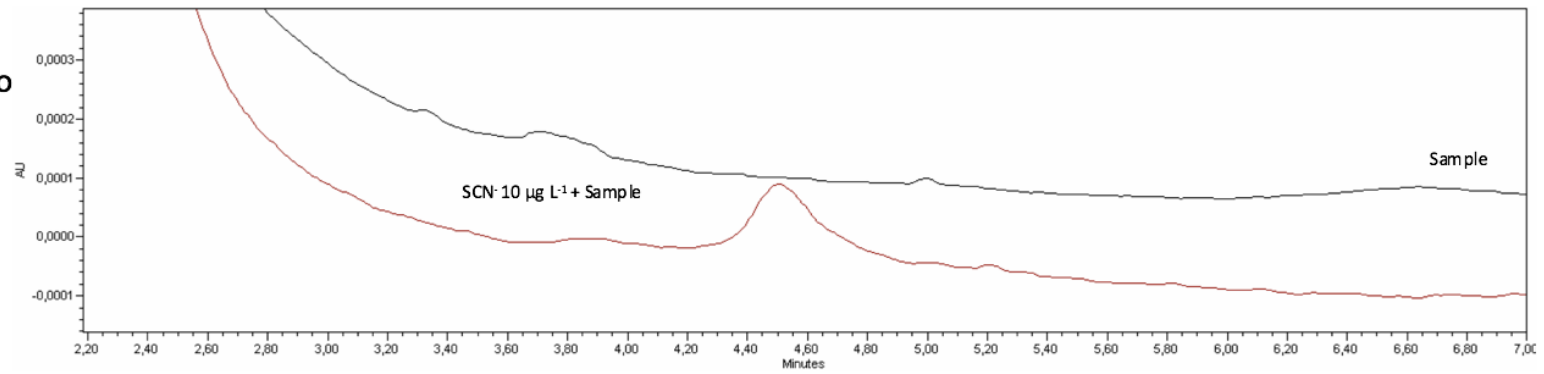

S1ap

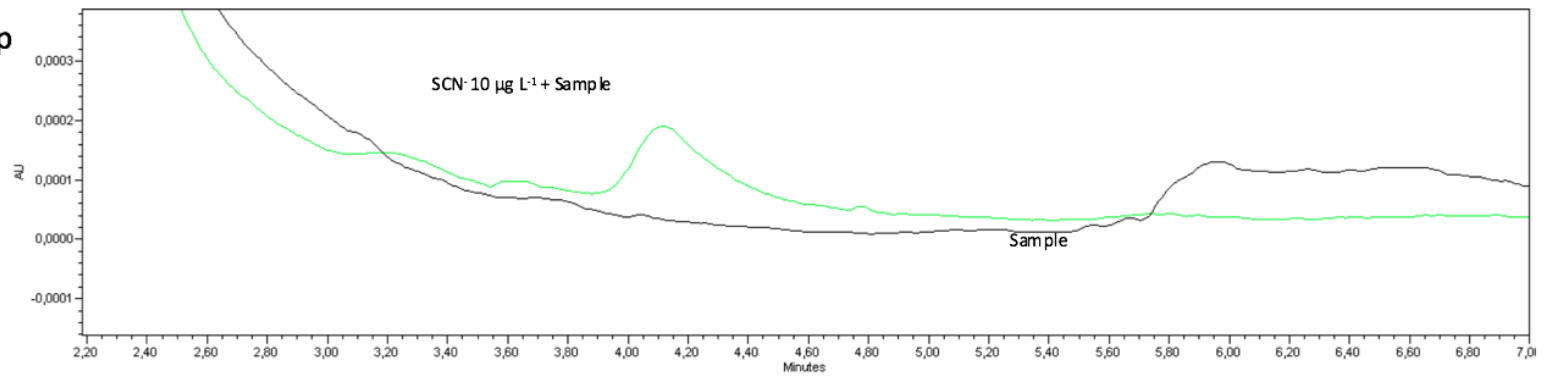

S1aq

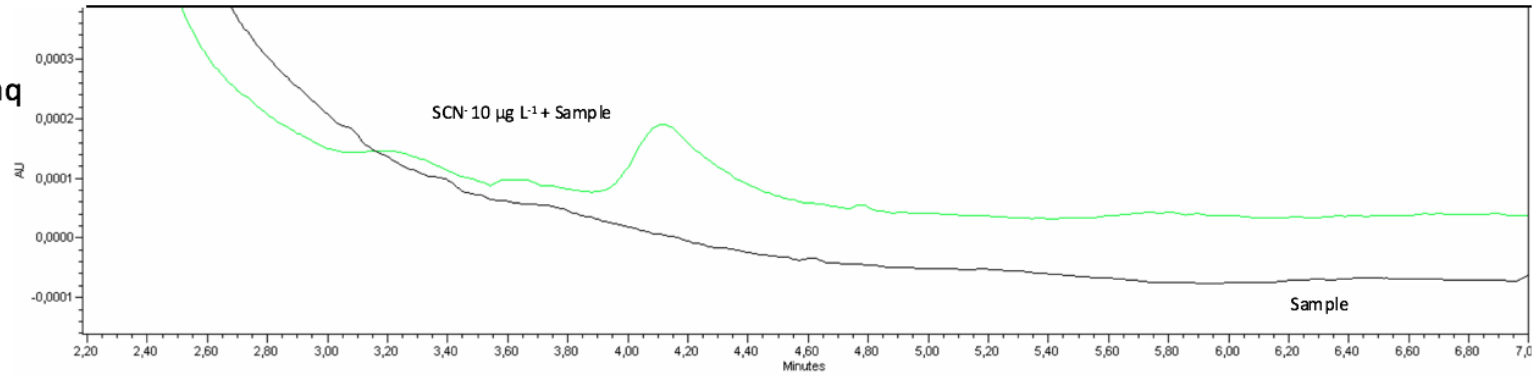

S1ar

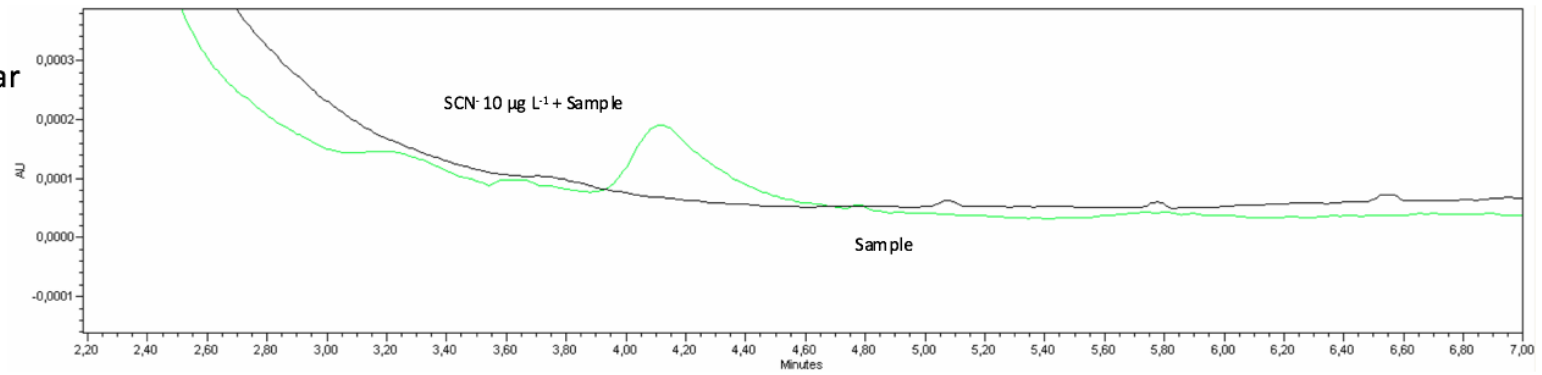

S1as

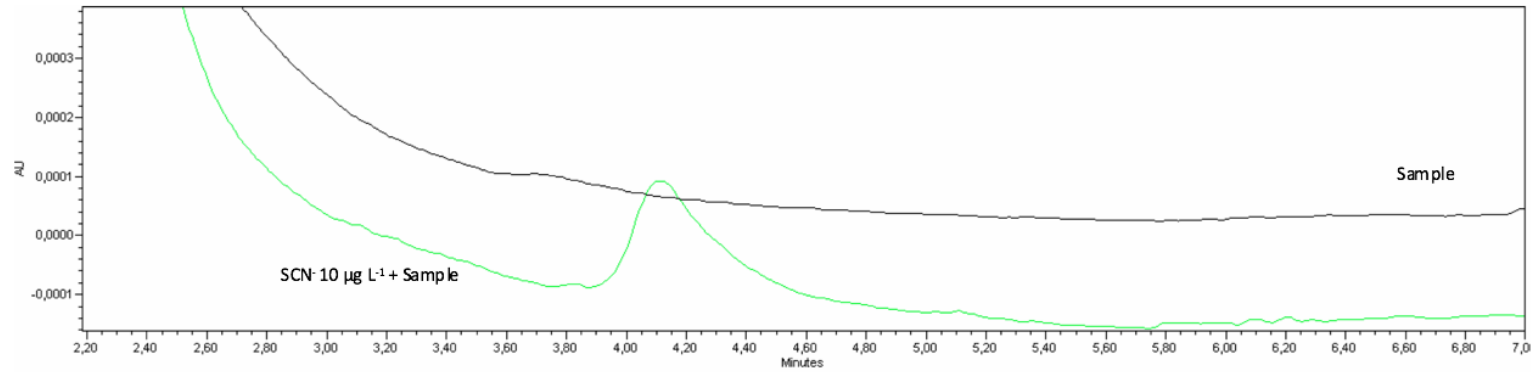

S1at

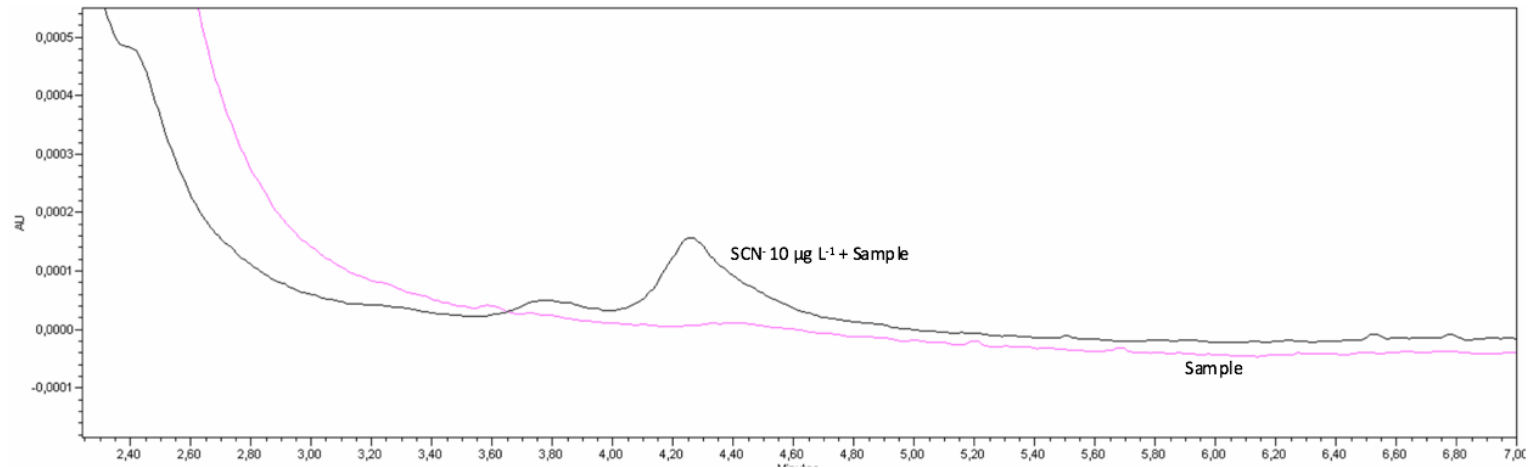



S1au

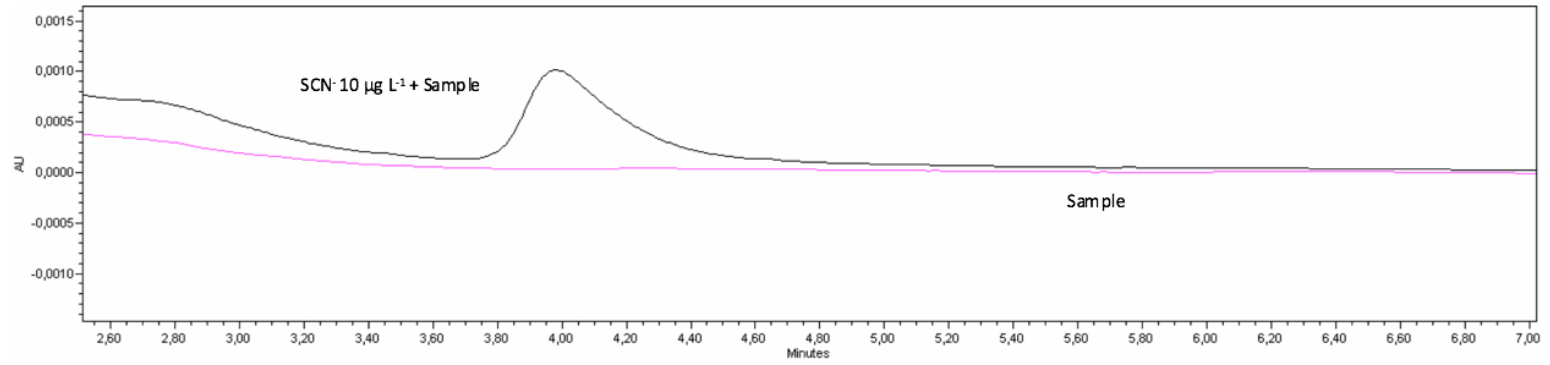

S1av

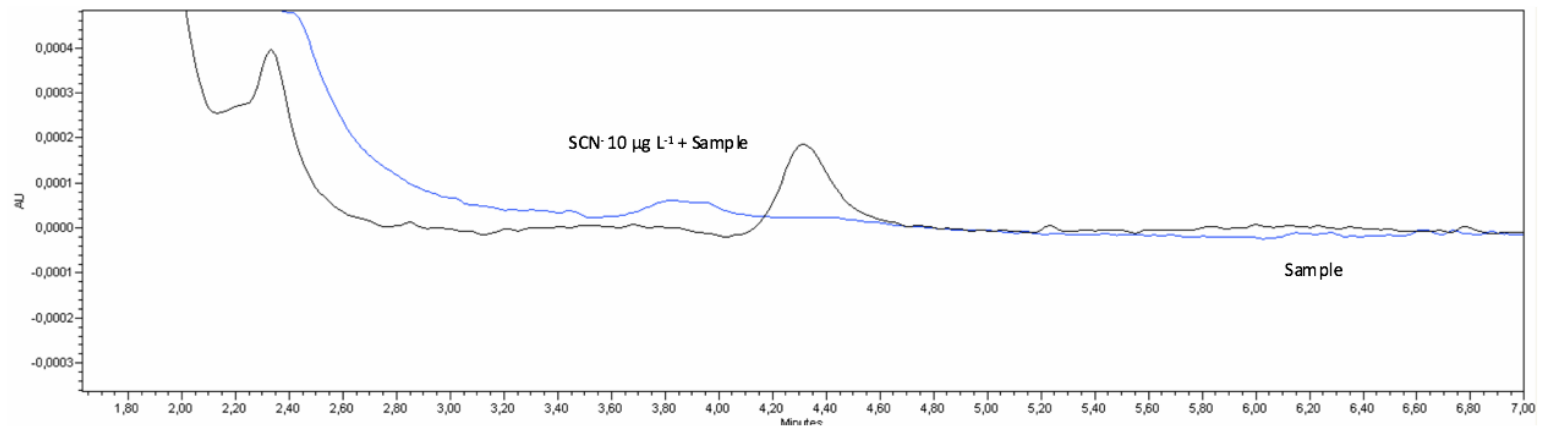

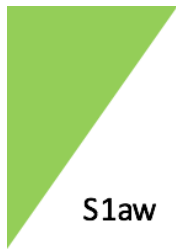

S1aw

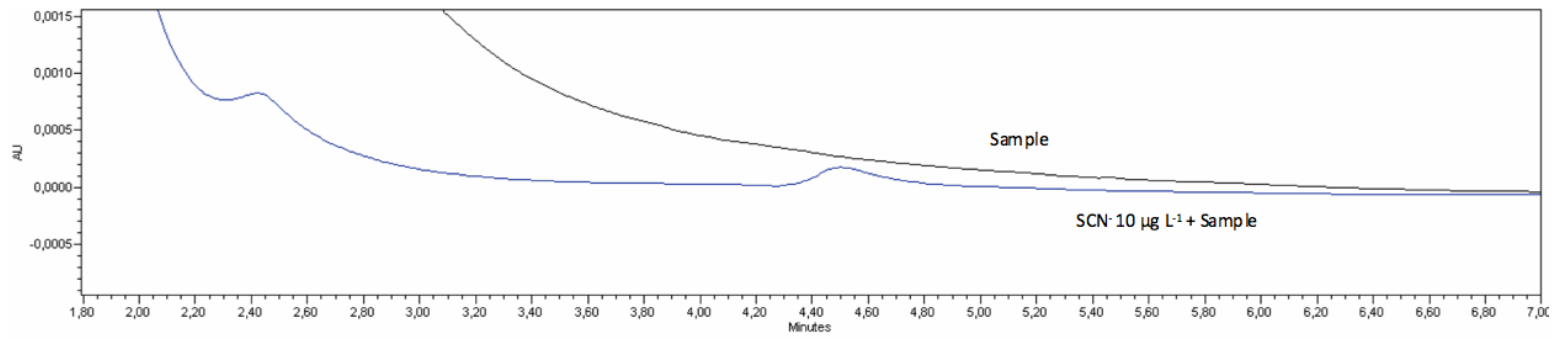

S1ax

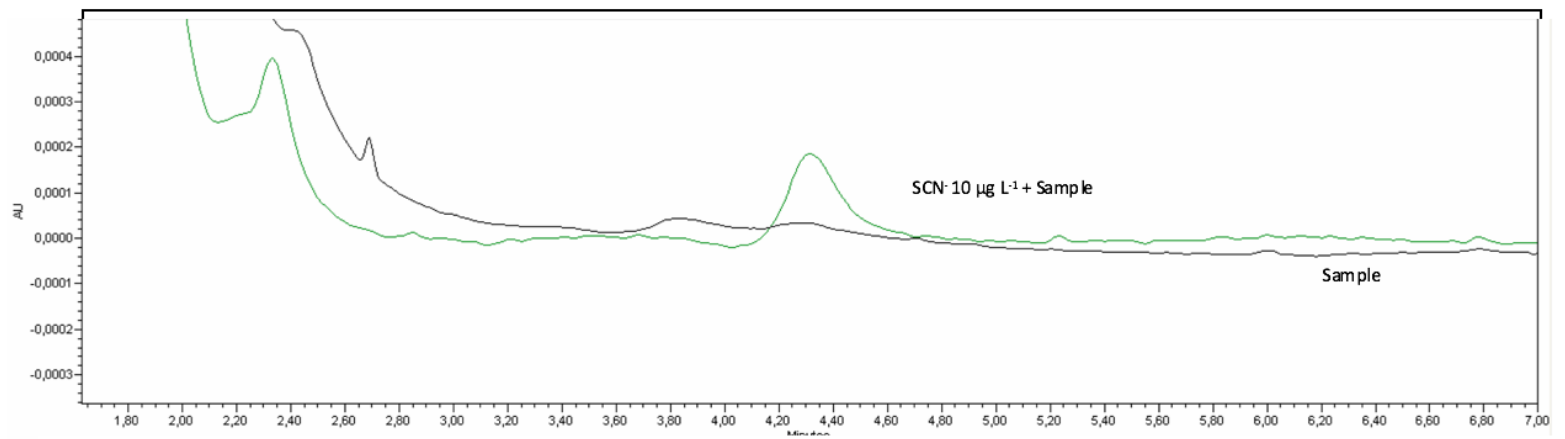

S1ay

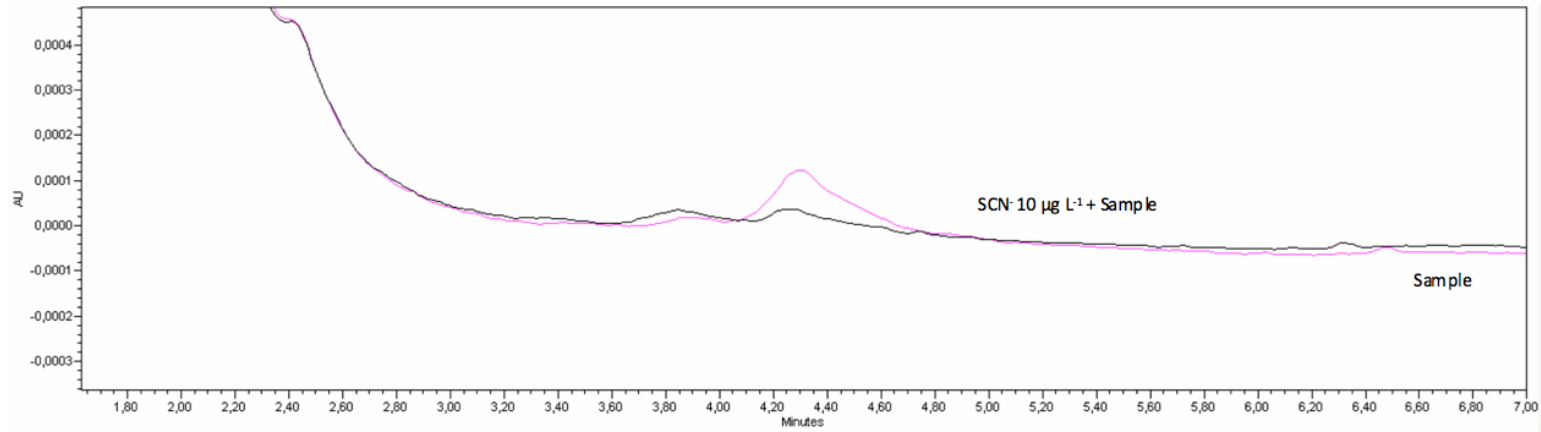

S1az

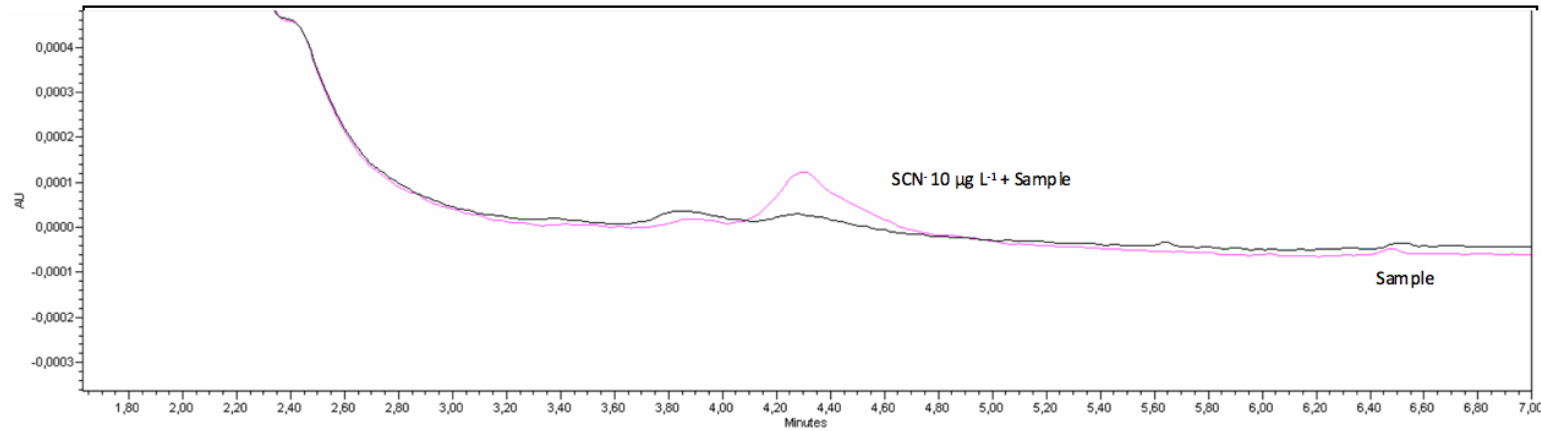

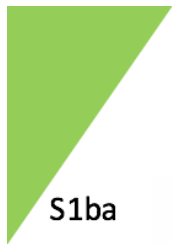

S1ba

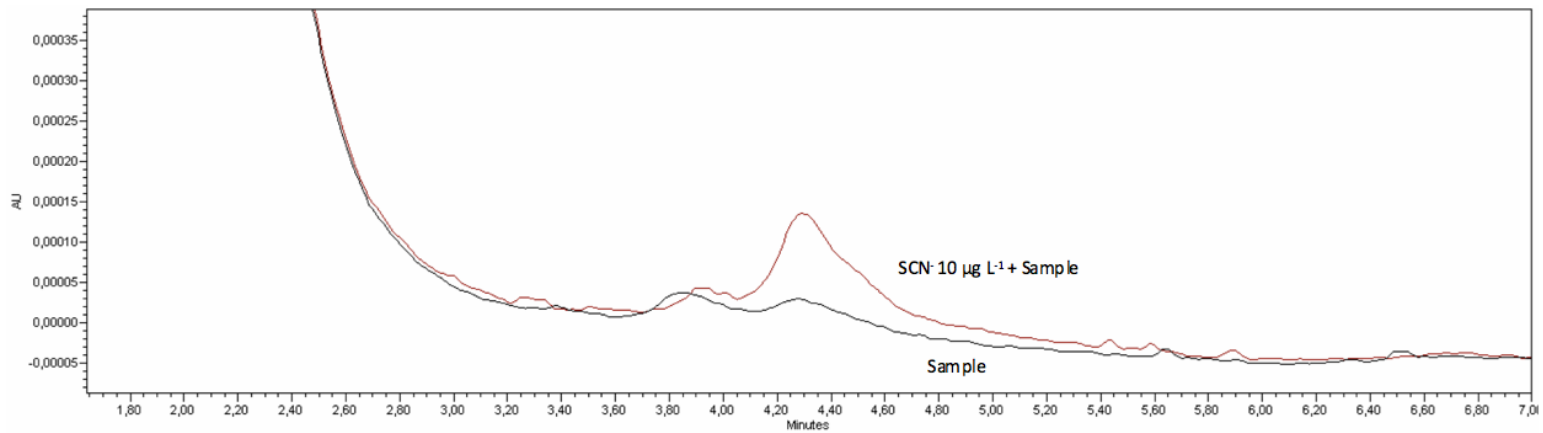

S1bb

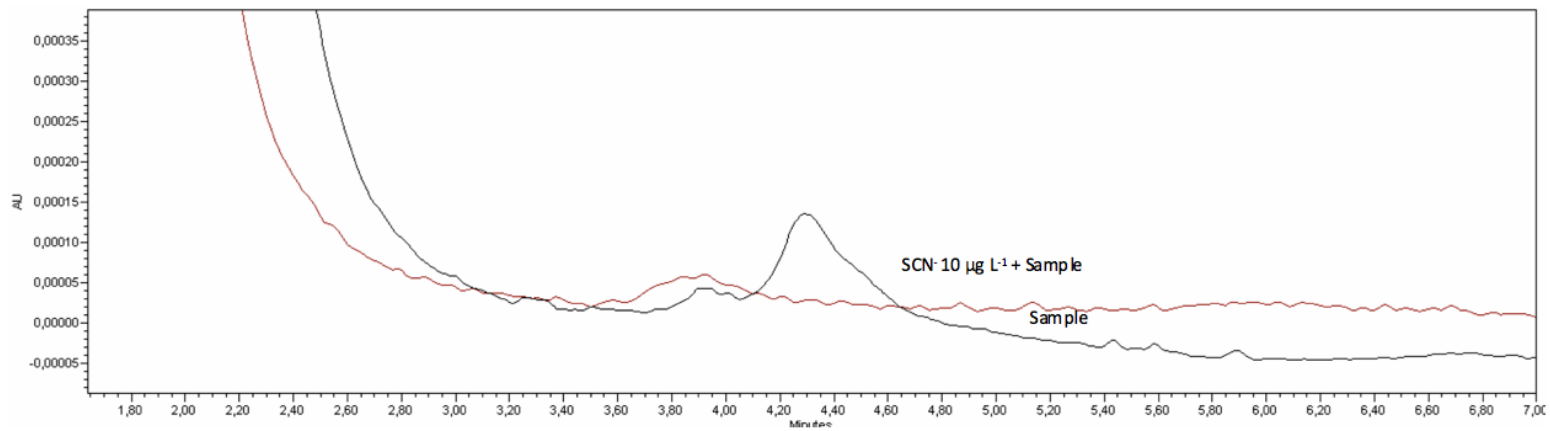

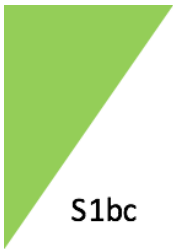

S1bc

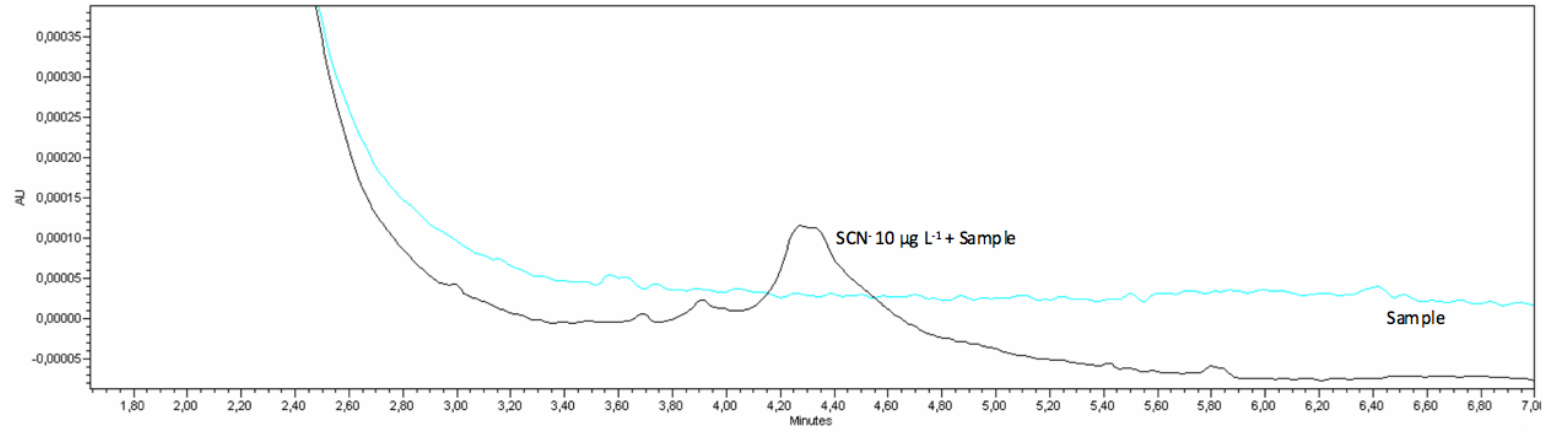

S1bd

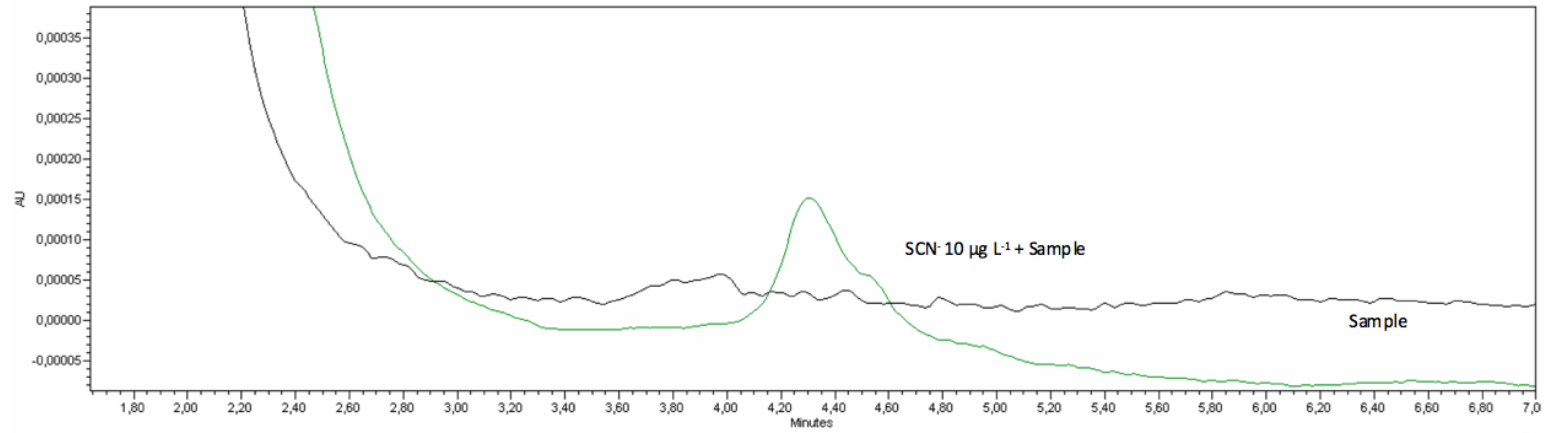

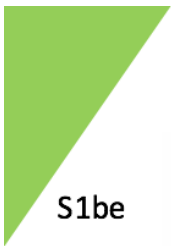

S1be

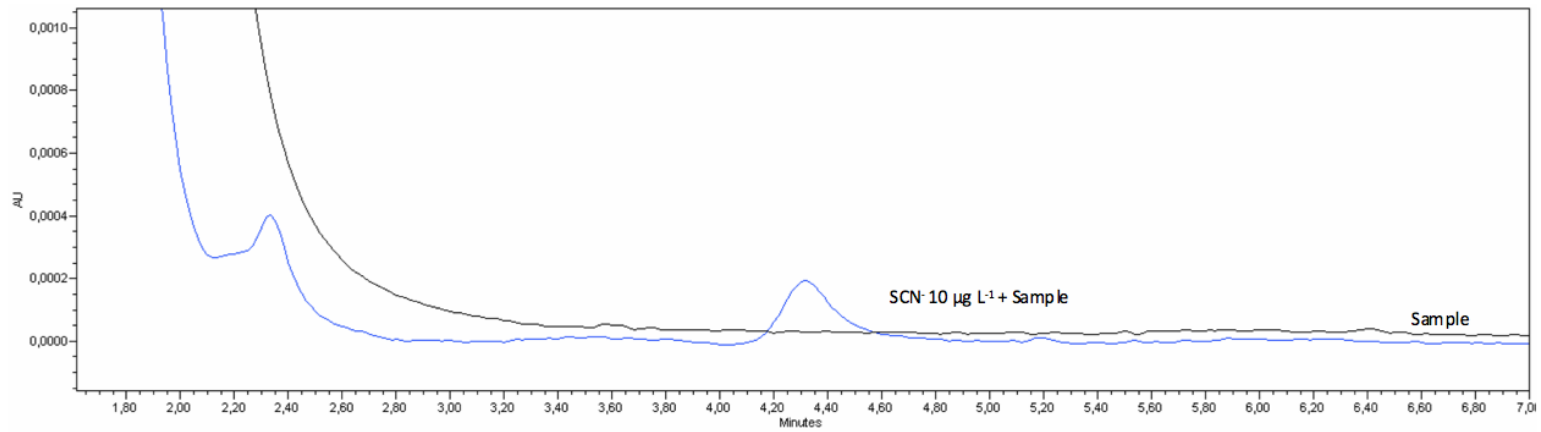

S1bf

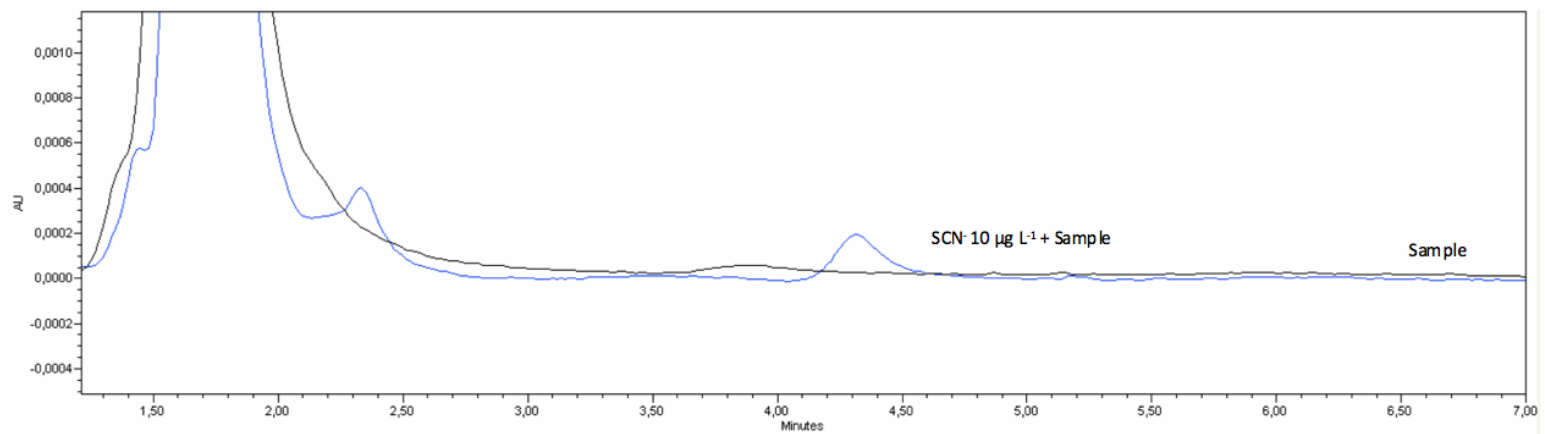

S1bg

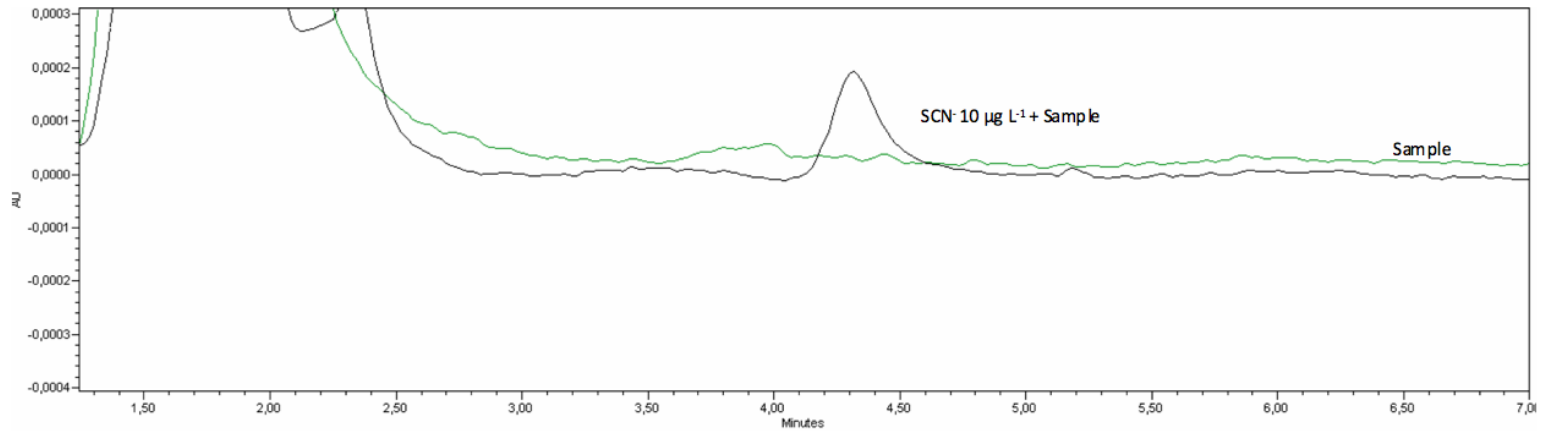

S1bh

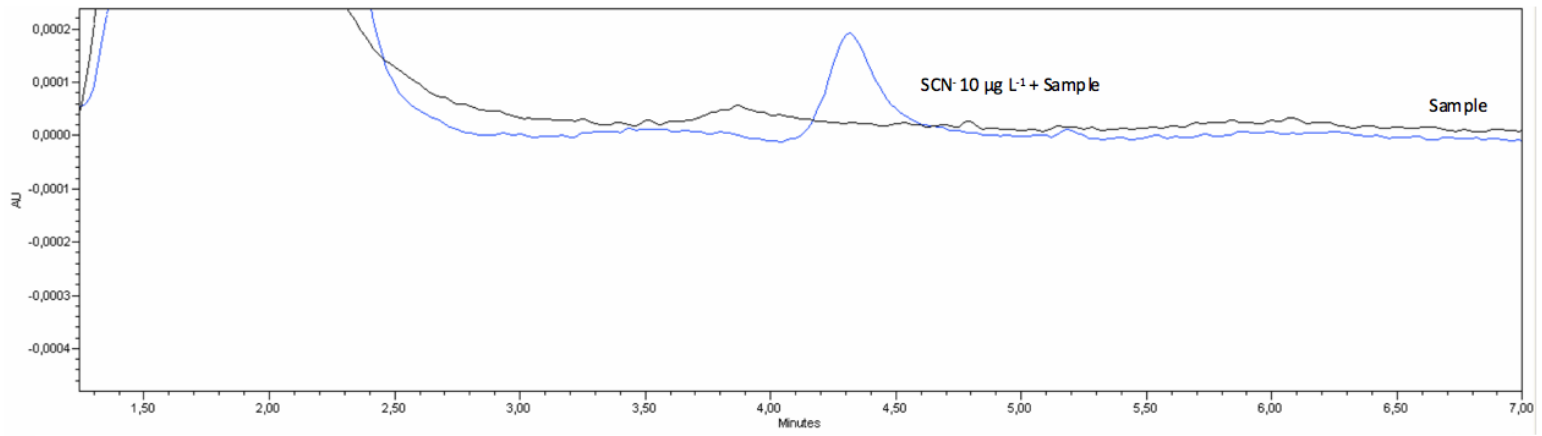

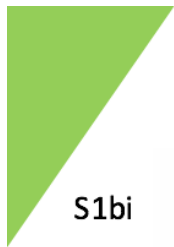

S1bi

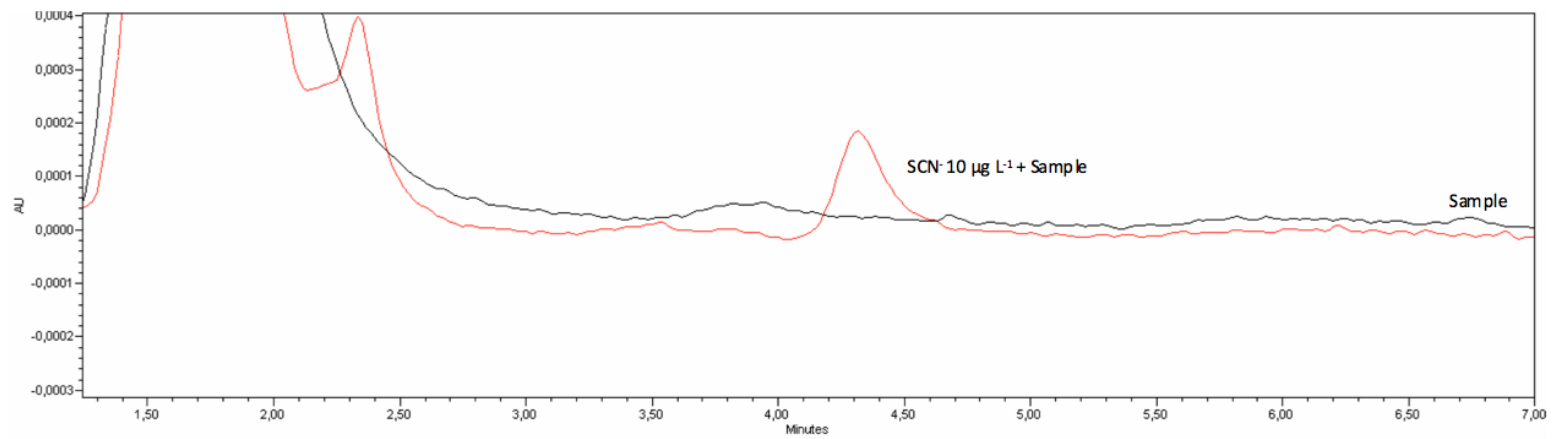

S1bj

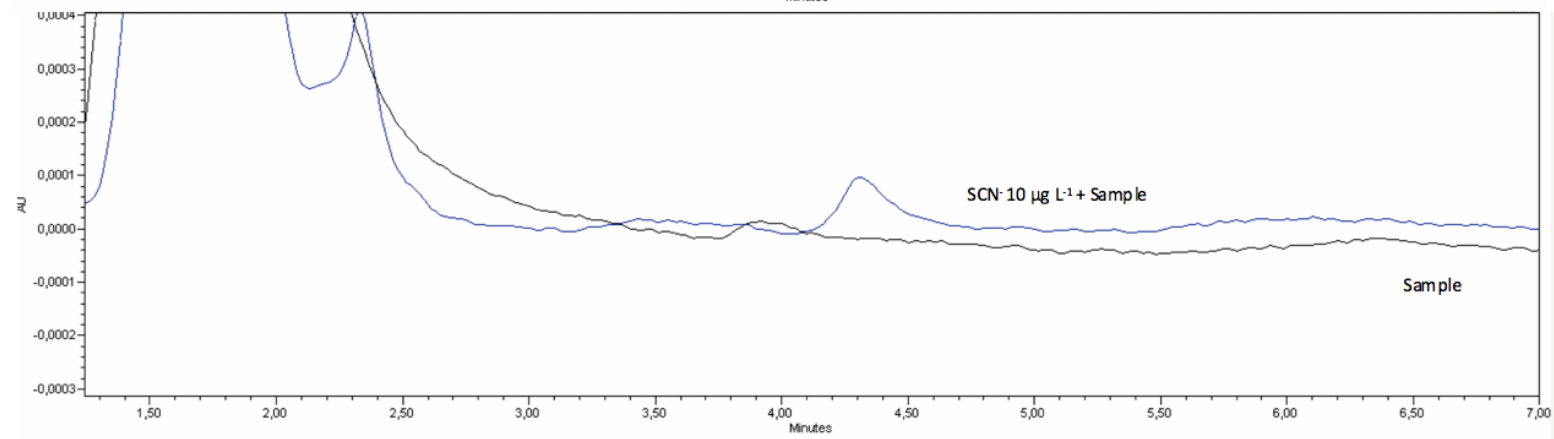



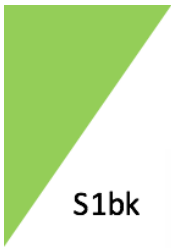

S1bk

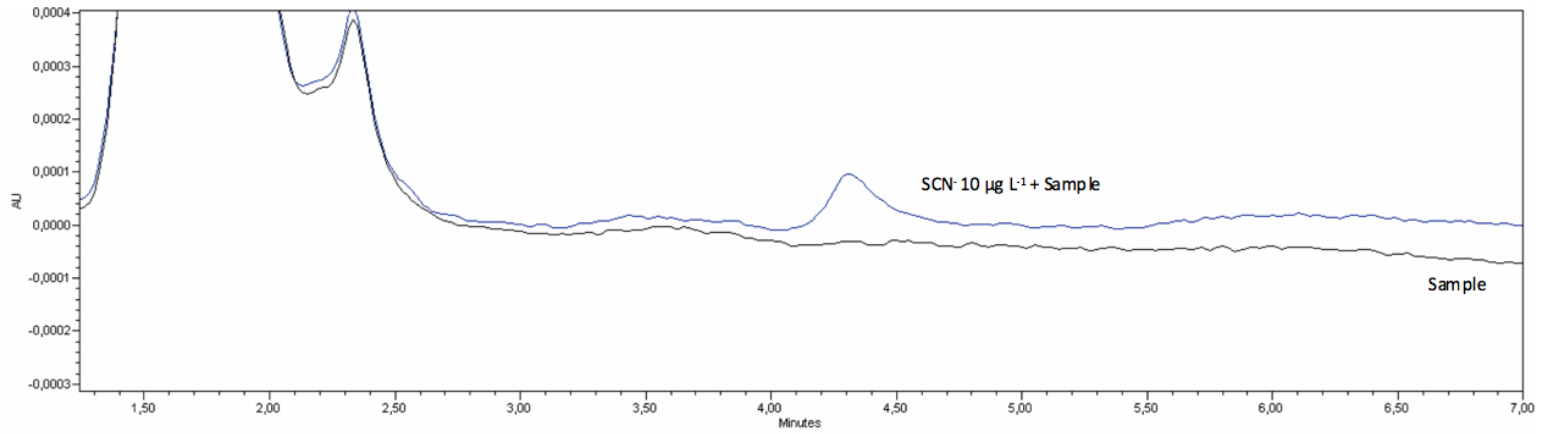

S1bl

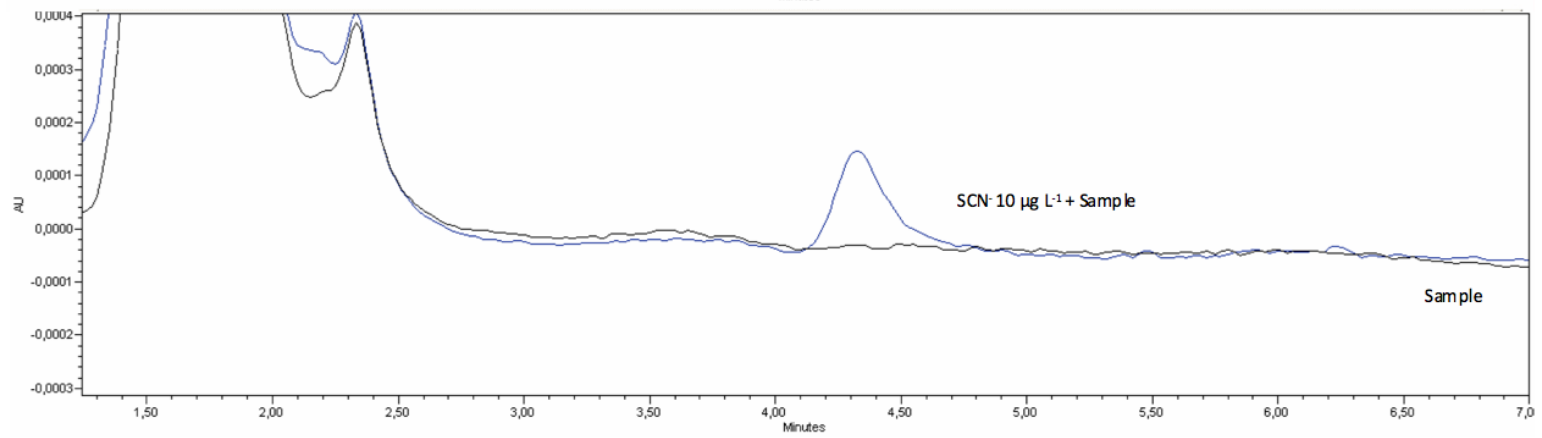

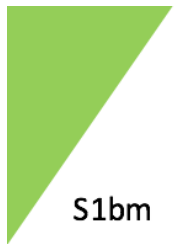

S1bm

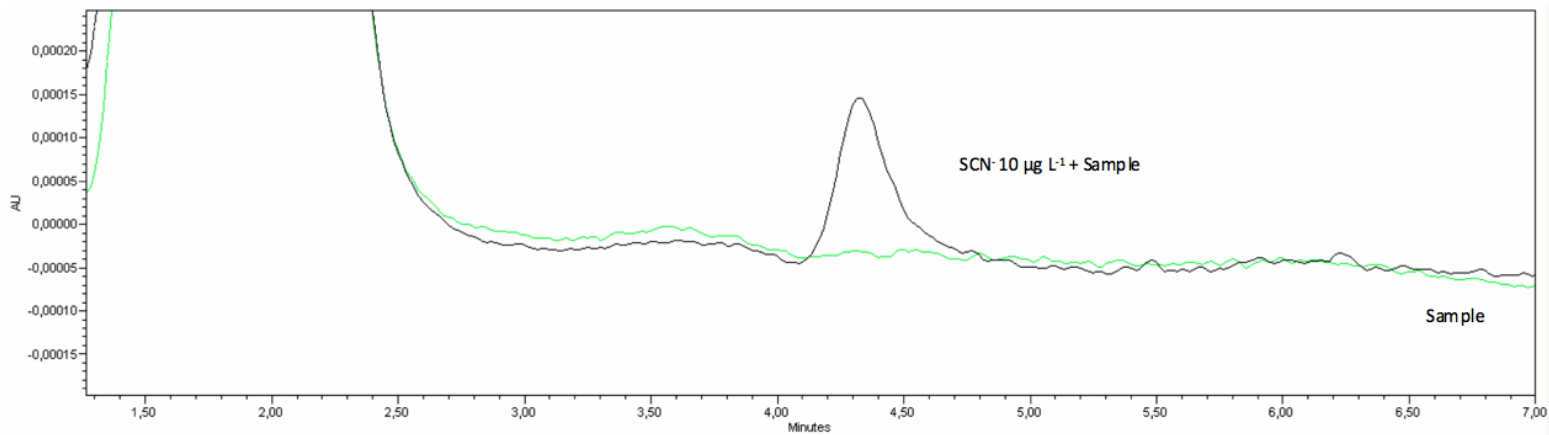

S1bn

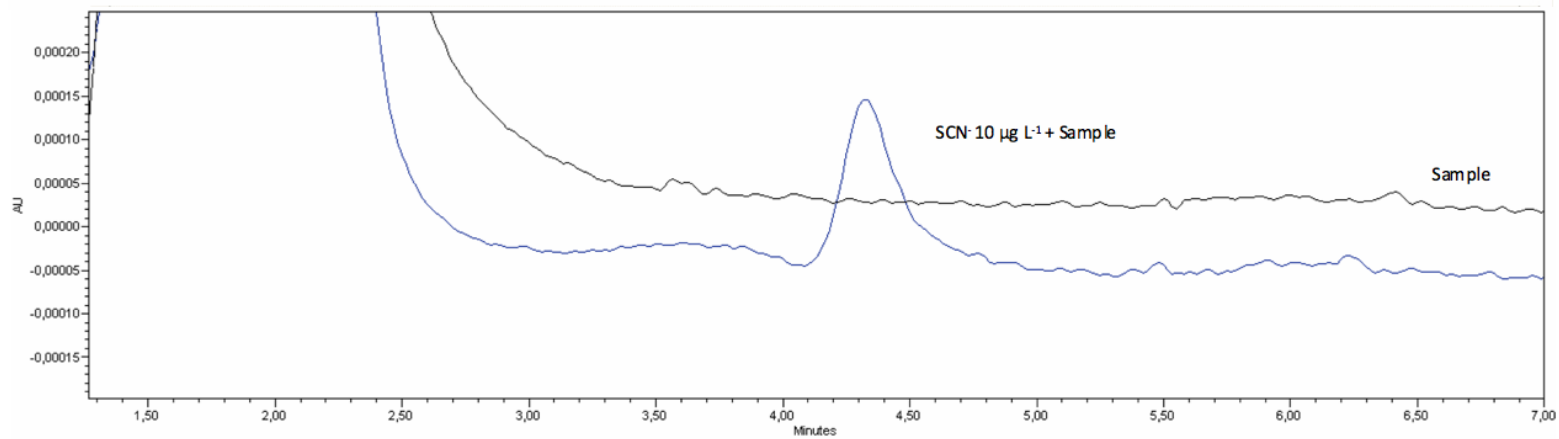

S1bo

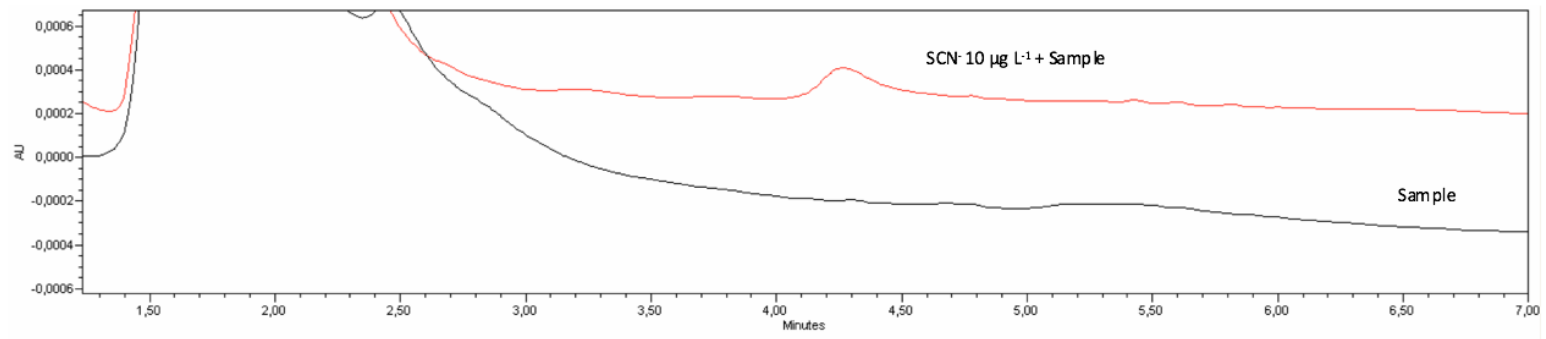

S1bp

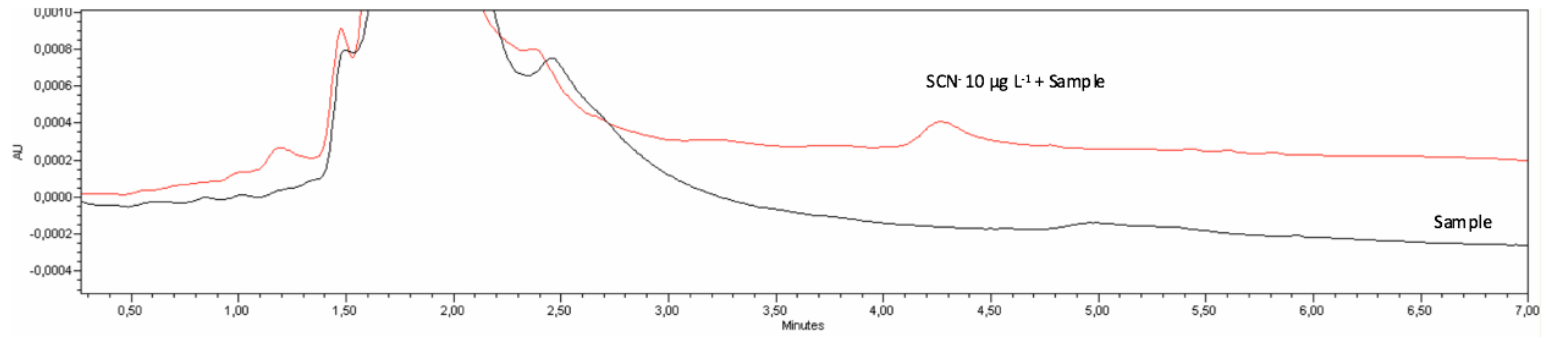

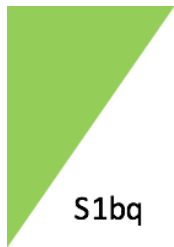

S1bq

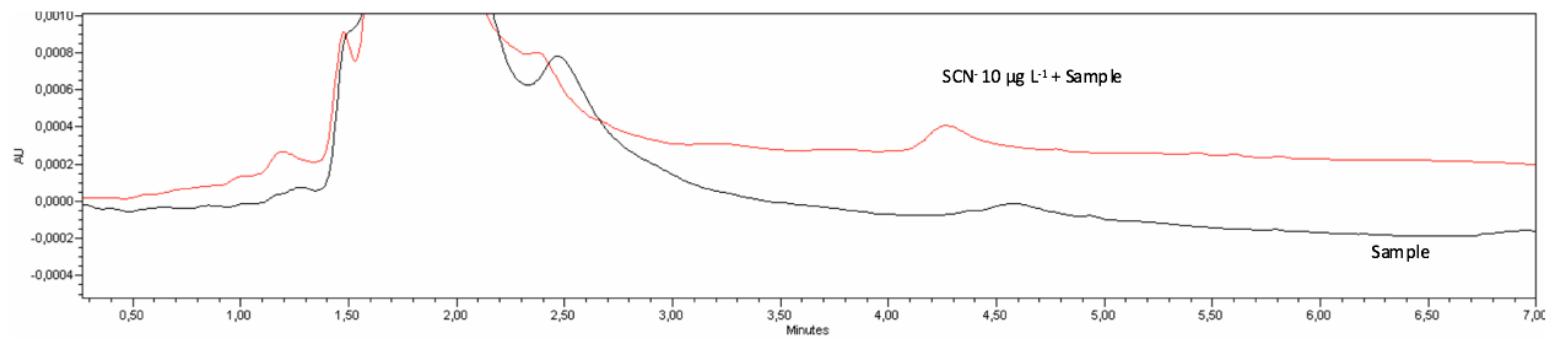

S1br

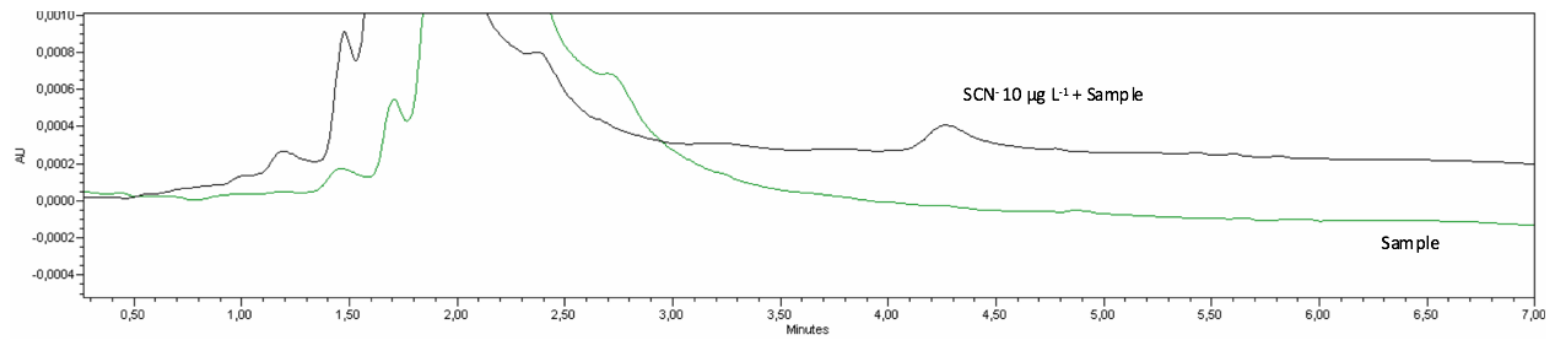

S1bs

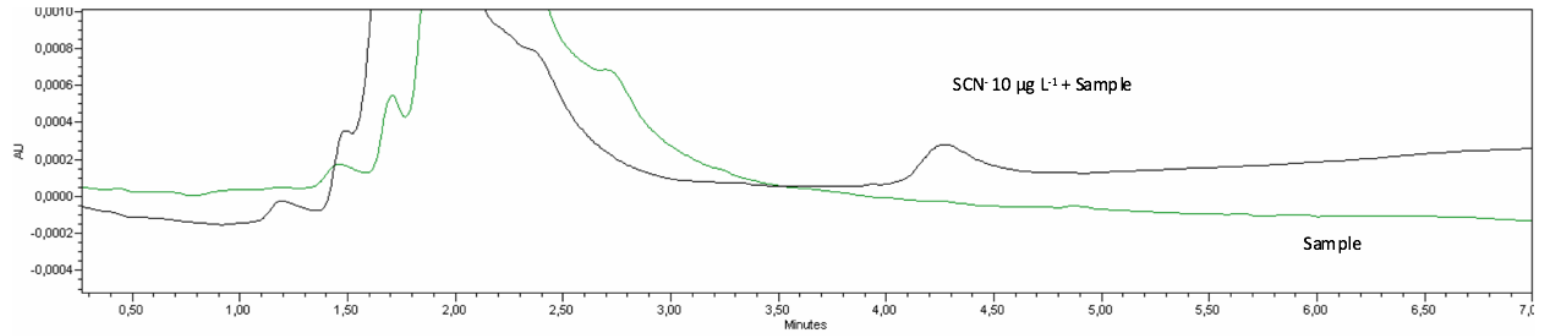

S1bt

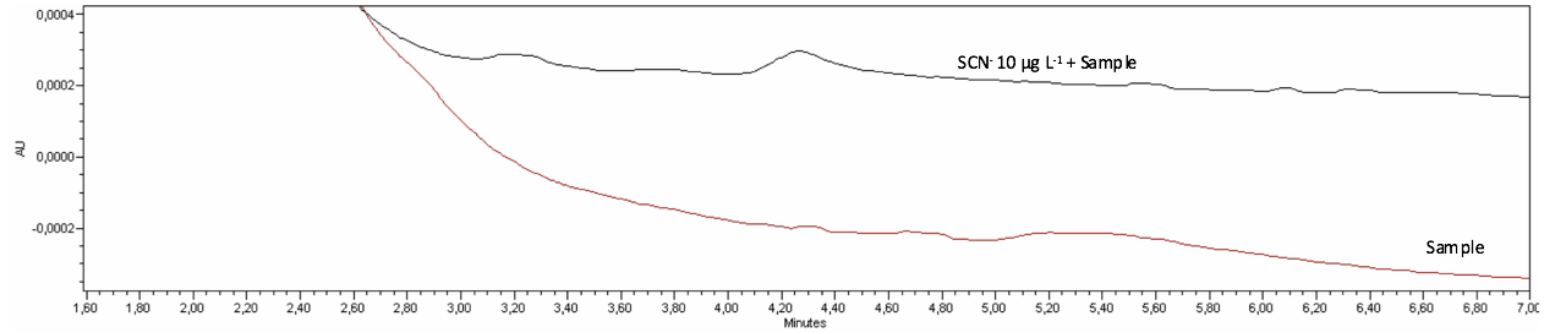

S1bu

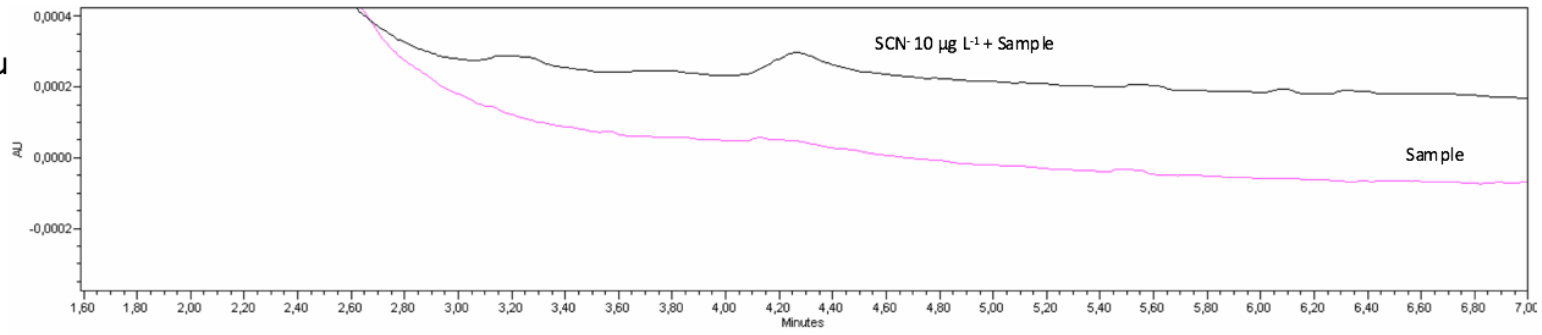

S1bv

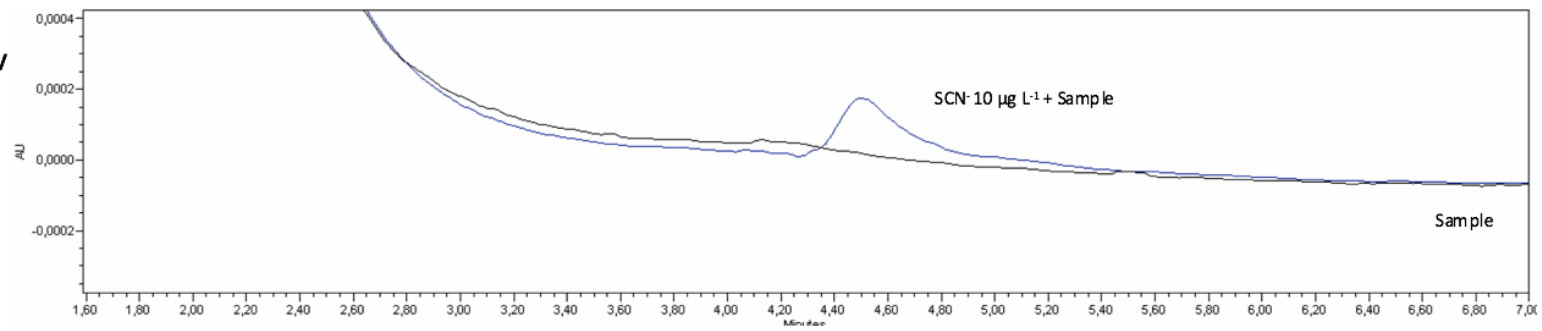

**Supplementary Figure S2** – Chromatograms performed using HPLC to screen for the presence of  $\text{SCN}^-$  in seawater used to depurate blue damsels *Chrysiptera cyanea* (family Pomacentridae) of similar size during 24 h. A) Chromatograms representing a sample displaying potential levels of  $\text{SCN}^-$  (sample), with identification being confirmed through the spiking of the sample with  $40 \mu\text{g L}^{-1}$  of  $\text{SCN}^-$  ( $\text{SCN}^- 40 \mu\text{g L}^{-1}$ ) and detecting a proportional increase in the peak of  $\text{SCN}^-$  present in the sampled spiked with  $40 \mu\text{g L}^{-1}$  of  $\text{SCN}^-$  (Sample +  $\text{SCN}^- 40 \mu\text{g L}^{-1}$ ); B) Chromatograms representing a sample displaying no detectable level of  $\text{SCN}^-$  (sample), with the absence of  $\text{SCN}^-$  being confirmed through the spiking of the sample with  $40 \mu\text{g L}^{-1}$  of  $\text{SCN}^-$  ( $\text{SCN}^- 40 \mu\text{g L}^{-1}$ ) and the sole detection of the peak referring to concentration of  $\text{SCN}^-$  added to the sample (Sample +  $\text{SCN}^- 40 \mu\text{g L}^{-1}$ ); C) Chromatograms representing a sample displaying potential levels of  $\text{SCN}^-$  (sample), with the absence of  $\text{SCN}^-$  being confirmed through the spiking of the sample with  $40 \mu\text{g L}^{-1}$  of  $\text{SCN}^-$  ( $\text{SCN}^- 40 \mu\text{g L}^{-1}$ ) and the detection of two peaks referring to the concentration of  $\text{SCN}^-$  added to the sample and the ion initially detected that was not confirmed as  $\text{SCN}^-$  (Sample +  $\text{SCN}^- 40 \mu\text{g L}^{-1}$ ). Retention times recorded for the  $\text{SCN}^-$  were always between 4.2 to 4.8 minutes, with shifts in retention times for  $\text{SCN}^-$  peaks represented in the figure being due to the stripping of PEG (Polyethyleneglycol -  $\text{H}(\text{OCH}_2\text{CH}_2)_n\text{OH}$ ) used to modify the C30 column employed for HPLC analysis.

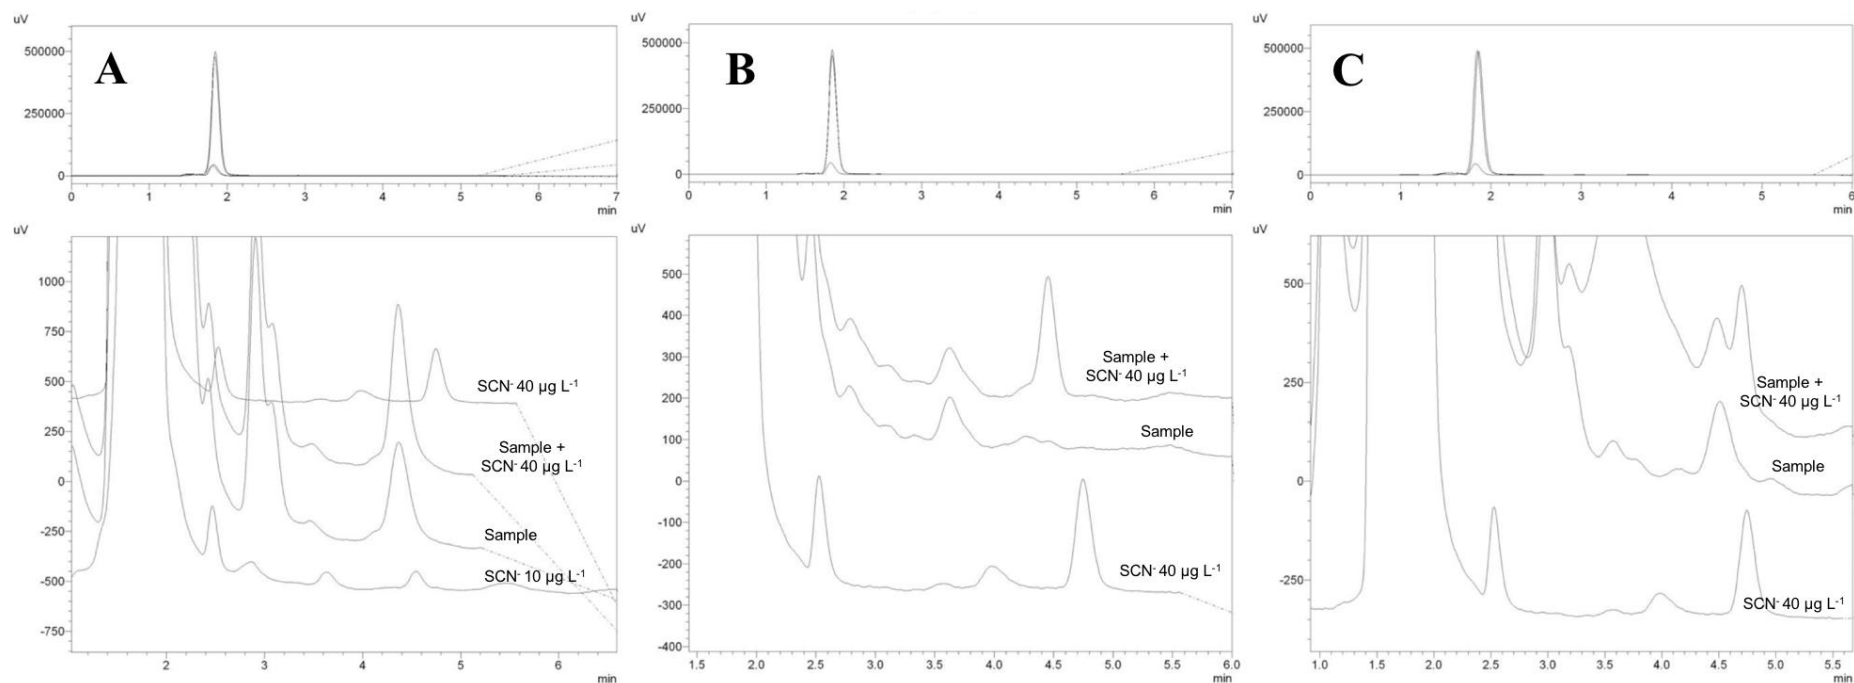

**Supplementary Table S1** – HPLC chromatogram of standard solutions and all live reef fish screened for thiocyanate (SCN<sup>-</sup>) excretion after being depurated for 24 h in synthetic seawater along with their family, scientific and common names. Scientific names of fish species and families are reported according to WoRMS<sup>20</sup>, while common names are reported according to Michael<sup>21</sup>.

| <b>Standart Solutions</b>              |                |
|----------------------------------------|----------------|
| Base Line                              | Retention Time |
| SCN <sup>-</sup> 40 µg L <sup>-1</sup> | 4,0952         |
| SCN <sup>-</sup> 20 µg L <sup>-1</sup> | 4,1013         |
| SCN <sup>-</sup> 10 µg L <sup>-1</sup> | 4,1592         |
| SCN <sup>-</sup> 5 µg L <sup>-1</sup>  | 4,1491         |
| SCN <sup>-</sup> 20 µg L <sup>-1</sup> | 4,5013         |
| SCN <sup>-</sup> 10 µg L <sup>-1</sup> | 4,5503         |
| <b>Average</b>                         | <b>4,2594</b>  |
| Max value                              | 4,5503         |
| Min value                              | 4,0952         |
| Supplementary figure S1a and S1b       |                |



Supplementary Table S1 (continued)

| Chromatograms tested positive for SCN <sup>-</sup> *(Detection Limit = 10 µg L <sup>-1</sup> SCN <sup>-</sup> ) |                 |                               |                            |                      |                                                 |                |                |                |
|-----------------------------------------------------------------------------------------------------------------|-----------------|-------------------------------|----------------------------|----------------------|-------------------------------------------------|----------------|----------------|----------------|
| Family                                                                                                          | Common name     | Species                       | Common name                | Supplementary figure | Base Line                                       | Retention Time | Base line      | Retention Time |
| Acanthuridae                                                                                                    | Surgeonfishes   | <i>Acanthurus lineatus</i>    | Lined surgeonfish          | S1c                  | SCN <sup>-</sup> 20 µg L <sup>-1</sup> + Sample | 4,1821         | Sample         | 3,9716         |
|                                                                                                                 |                 | <i>Zebrasoma scopas</i>       | Brown tang                 | S1g                  | SCN <sup>-</sup> 20 µg L <sup>-1</sup> + Sample | 4,0323         | Sample         | 4,0321         |
| Chaetodontidae                                                                                                  | Butterflyfishes | <i>Chelmon rostratus</i>      | Copperbanded butterflyfish | S1h                  | SCN <sup>-</sup> 20 µg L <sup>-1</sup> + Sample | 4,0010         | Sample         | 3,9563         |
|                                                                                                                 |                 | <i>Chelmon rostratus</i>      |                            | S1i                  | SCN <sup>-</sup> 20 µg L <sup>-1</sup> + Sample | 4,2162         | Sample         | 4,0100         |
|                                                                                                                 |                 | <i>Chelmon rostratus</i>      |                            | S1j                  | SCN <sup>-</sup> 20 µg L <sup>-1</sup> + Sample | 4,7456         | Sample         | 4,3798         |
| Monacanthidae                                                                                                   | Foolfish        | <i>Acreichthys tomentosus</i> | Bristle-tail file-fish     | S1l                  | SCN <sup>-</sup> 20 µg L <sup>-1</sup> + Sample | 4,6770         | Sample         | 4,6928         |
| Pomacentridae                                                                                                   | Damselfishes    | <i>Chrysiptera cyanea</i>     | Blue damselfish            | S2A                  | SCN <sup>-</sup> 40 µg L <sup>-1</sup> + Sample | 4,5234         | Sample         | 4,5765         |
| Pomacanthidae                                                                                                   | Angelfishes     | <i>Centropyge ferrugata</i>   | Rusty angelfish            | S1d                  | SCN <sup>-</sup> 20 µg L <sup>-1</sup> + Sample | 4,1753         | Sample         | 4,0924         |
|                                                                                                                 |                 | <i>Centropyge ferrugata</i>   |                            | S1e                  | SCN <sup>-</sup> 20 µg L <sup>-1</sup> + Sample | 4,1286         | Sample         | 4,1174         |
|                                                                                                                 |                 | <i>Centropyge ferrugata</i>   |                            | S1f                  | SCN <sup>-</sup> 20 µg L <sup>-1</sup> + Sample | 4,1985         | Sample         | 4,1291         |
| Siganidae                                                                                                       | Rabbitfishes    | <i>Siganus vulpinus</i>       | Foxface rabbitfish         | S1k                  | SCN <sup>-</sup> 20 µg L <sup>-1</sup> + Sample | 4,009          | Sample         | 4,1110         |
| <b>Average</b>                                                                                                  |                 |                               |                            |                      |                                                 | <b>4,2372</b>  | <b>Average</b> | <b>4,1881</b>  |
| Max value                                                                                                       |                 |                               |                            |                      |                                                 | 4,6770         | Max value      | 4,6928         |
| Min value                                                                                                       |                 |                               |                            |                      |                                                 | 4,0010         | Min value      | 3,9563         |

Supplementary Table S1 (continued)

| Chromatograms tested negative for SCN <sup>-</sup> * (For concentrations above 10 µg L <sup>-1</sup> SCN <sup>-</sup> ) |                     |                                |                            |                      |                                    |                |
|-------------------------------------------------------------------------------------------------------------------------|---------------------|--------------------------------|----------------------------|----------------------|------------------------------------|----------------|
| Family                                                                                                                  | Common name         | Species                        | Common name                | Supplementary figure | Base Line                          | Retention Time |
| <b>Acanthuridae</b>                                                                                                     | Surgeonfishes       | <i>Acanthurus lineatus</i>     | Lined surgeonfish          | S1m                  | SCN 10 µg L <sup>-1</sup> + Sample | 3,9964         |
|                                                                                                                         |                     | <i>Acanthurus lineatus</i>     |                            | S1n                  | SCN 10 µg L <sup>-1</sup> + Sample | 4,1693         |
|                                                                                                                         |                     | <i>Zebrasoma scopas</i>        | Brown tang                 | S1s                  | SCN 10 µg L <sup>-1</sup> + Sample | 4,0598         |
|                                                                                                                         |                     | <i>Zebrasoma scopas</i>        |                            | S1t                  | SCN 10 µg L <sup>-1</sup> + Sample | 3,9321         |
|                                                                                                                         |                     | <i>Zebrasoma scopas</i>        |                            | S1u                  | SCN 10 µg L <sup>-1</sup> + Sample | 3,9479         |
|                                                                                                                         |                     | <i>Acanthurus pyroferus</i>    | Chocolate surgeonfish      | S1am                 | SCN 10 µg L <sup>-1</sup> + Sample | 4,5911         |
|                                                                                                                         |                     | <i>Acanthurus tennentii</i>    | Doubleband surgeonfish     | S1an                 | SCN 10 µg L <sup>-1</sup> + Sample | 4,4776         |
|                                                                                                                         |                     | <i>Zebrasoma veliferum</i>     | Sailfin tang               | S1ao                 | SCN 10 µg L <sup>-1</sup> + Sample | 4,4312         |
| <b>Apogonidae</b>                                                                                                       | Cardinalfishes      | <i>Pterapogon kauderni</i>     | Banggai cardinalfish       | S1ap                 | SCN 10 µg L <sup>-1</sup> + Sample | 4,1345         |
|                                                                                                                         |                     | <i>Sphaeramia nematoptera</i>  | Pajama cardinalfish        | S1aq                 | SCN 10 µg L <sup>-1</sup> + Sample | 4,1444         |
| <b>Balistidae</b>                                                                                                       | Triggerfishes       | <i>Odonus niger</i>            | Niger triggerfish          | S1ar                 | SCN 10 µg L <sup>-1</sup> + Sample | 4,1255         |
| <b>Blenniidae</b>                                                                                                       | Blennies            | <i>Ecsenius bicolor</i>        | Bicolor blenny             | S1as                 | SCN 10 µg L <sup>-1</sup> + Sample | 4,1677         |
| <b>Callionymidae</b>                                                                                                    | Dragonets           | <i>Synchiropus splendidus</i>  | Green mandarinfish         | S1at                 | SCN 10 µg L <sup>-1</sup> + Sample | 4,2987         |
| <b>Chaetodontidae</b>                                                                                                   | Butterflyfishes     | <i>Chelmon rostratus</i>       | Copperbanded butterflyfish | S1w                  | SCN 10 µg L <sup>-1</sup> + Sample | 3,9956         |
|                                                                                                                         |                     | <i>Chelmon rostratus</i>       |                            | S1y                  | SCN 10 µg L <sup>-1</sup> + Sample | 3,9897         |
|                                                                                                                         |                     | <i>Chaetodon auriga</i>        | Threadfin butterflyfish    | S1au                 | SCN 10 µg L <sup>-1</sup> + Sample | 4,0202         |
|                                                                                                                         |                     | <i>Heniochus.sp</i>            | -                          | S1av                 | SCN 10 µg L <sup>-1</sup> + Sample | 4,3124         |
| <b>Labridae</b>                                                                                                         | Wrasses             | <i>Labroides dimidiatus</i>    | Bluestreak cleaner wrasse  | S1aw                 | SCN 10 µg L <sup>-1</sup> + Sample | 4,5211         |
| <b>Lutjanidae</b>                                                                                                       | Snappers            | <i>Lutjanus sebae</i>          | Emperor snapper            | S1ax                 | SCN 10 µg L <sup>-1</sup> + Sample | 4,3211         |
| <b>Microdesmidae</b>                                                                                                    | Dartfishes          | <i>Nemateleotris magnifica</i> | Fire goby                  | S1v                  | SCN 10 µg L <sup>-1</sup> + Sample | 4,5984         |
|                                                                                                                         |                     | <i>Nemateleotris magnifica</i> |                            | S1x                  | SCN 10 µg L <sup>-1</sup> + Sample | 4,6001         |
| <b>Ostraciidae</b>                                                                                                      | Cowfishes/Boxfishes | <i>Ostracion cubicus</i>       | Cube boxfish               | S1ay                 | SCN 10 µg L <sup>-1</sup> + Sample | 4,3031         |
|                                                                                                                         |                     | <i>Ostracion cubicus</i>       |                            | S1az                 | SCN 10 µg L <sup>-1</sup> + Sample | 4,3112         |
|                                                                                                                         |                     | <i>Ostracion cubicus</i>       |                            | S1ba                 | SCN 10 µg L <sup>-1</sup> + Sample | 4,3428         |

Supplementary Table S1 (continued)

| Chromatograms tested negative for $\text{SCN}^-$ * (For concentrations above $10 \mu\text{g L}^{-1} \text{SCN}^-$ ) |                             |                             |                 |                                                      |                                                      |                                                      |
|---------------------------------------------------------------------------------------------------------------------|-----------------------------|-----------------------------|-----------------|------------------------------------------------------|------------------------------------------------------|------------------------------------------------------|
| Family                                                                                                              | Common name                 | Species                     | Common name     | Supplementary figure                                 | Base Line                                            | Retention Time                                       |
| Pomacentridae                                                                                                       | Damselishes                 | <i>Chrysiptera cyanea</i>   | Blue damselfish | S2B                                                  | $\text{SCN}^- 40 \mu\text{g L}^{-1} + \text{Sample}$ | 4,6234                                               |
|                                                                                                                     |                             | <i>Chrysiptera cyanea</i>   |                 | S2C                                                  | $\text{SCN}^- 40 \mu\text{g L}^{-1} + \text{Sample}$ | 4,6109                                               |
|                                                                                                                     |                             | <i>Chrysiptera cyanea</i>   |                 | S1aa                                                 | $\text{SCN}^- 10 \mu\text{g L}^{-1} + \text{Sample}$ | 4,3210                                               |
|                                                                                                                     |                             | <i>Chrysiptera cyanea</i>   |                 | S1ab                                                 | $\text{SCN}^- 10 \mu\text{g L}^{-1} + \text{Sample}$ | 5,0090                                               |
|                                                                                                                     |                             | <i>Chrysiptera cyanea</i>   |                 | S1ac                                                 | $\text{SCN}^- 10 \mu\text{g L}^{-1} + \text{Sample}$ | 4,1230                                               |
|                                                                                                                     |                             | <i>Chrysiptera cyanea</i>   |                 | S1ad                                                 | $\text{SCN}^- 10 \mu\text{g L}^{-1} + \text{Sample}$ | 4,1807                                               |
|                                                                                                                     |                             | <i>Chrysiptera cyanea</i>   |                 | S1ae                                                 | $\text{SCN}^- 10 \mu\text{g L}^{-1} + \text{Sample}$ | 4,4098                                               |
|                                                                                                                     |                             | <i>Chrysiptera cyanea</i>   |                 | S1af                                                 | $\text{SCN}^- 10 \mu\text{g L}^{-1} + \text{Sample}$ | 4,5321                                               |
|                                                                                                                     |                             | <i>Chrysiptera cyanea</i>   |                 | S1ag                                                 | $\text{SCN}^- 10 \mu\text{g L}^{-1} + \text{Sample}$ | 4,4164                                               |
|                                                                                                                     |                             | <i>Chrysiptera cyanea</i>   |                 | S1ah                                                 | $\text{SCN}^- 10 \mu\text{g L}^{-1} + \text{Sample}$ | 4,5007                                               |
|                                                                                                                     |                             | <i>Chrysiptera cyanea</i>   |                 | S1ai                                                 | $\text{SCN}^- 10 \mu\text{g L}^{-1} + \text{Sample}$ | 4,5164                                               |
|                                                                                                                     |                             | <i>Chrysiptera cyanea</i>   |                 | S1aj                                                 | $\text{SCN}^- 10 \mu\text{g L}^{-1} + \text{Sample}$ | 4,5415                                               |
|                                                                                                                     |                             | <i>Amphiprion ocellaris</i> |                 | Ocellaris anemonefish                                | S1be                                                 | $\text{SCN}^- 10 \mu\text{g L}^{-1} + \text{Sample}$ |
|                                                                                                                     | <i>Amphiprion ocellaris</i> |                             | S1bf            | $\text{SCN}^- 10 \mu\text{g L}^{-1} + \text{Sample}$ | 4,3211                                               |                                                      |
|                                                                                                                     | <i>Chromis nitida</i>       | Barrier reef chromis        | S1bg            | $\text{SCN}^- 10 \mu\text{g L}^{-1} + \text{Sample}$ | 4,3121                                               |                                                      |
|                                                                                                                     | <i>Chromis nitida</i>       |                             | S1bh            | $\text{SCN}^- 10 \mu\text{g L}^{-1} + \text{Sample}$ | 4,2987                                               |                                                      |
|                                                                                                                     | <i>Chromis viridis</i>      |                             | S1bi            | $\text{SCN}^- 10 \mu\text{g L}^{-1} + \text{Sample}$ | 4,3228                                               |                                                      |
|                                                                                                                     | <i>Chromis viridis</i>      |                             | S1bj            | $\text{SCN}^- 10 \mu\text{g L}^{-1} + \text{Sample}$ | 4,3239                                               |                                                      |
|                                                                                                                     | <i>Chrysiptera parasema</i> | Yellowtail blue damselfish  | S1bk            | $\text{SCN}^- 10 \mu\text{g L}^{-1} + \text{Sample}$ | 4,3183                                               |                                                      |
|                                                                                                                     | <i>Chrysiptera parasema</i> |                             | S1bl            | $\text{SCN}^- 10 \mu\text{g L}^{-1} + \text{Sample}$ | 4,2976                                               |                                                      |
|                                                                                                                     | <i>Chrysiptera parasema</i> |                             | S1bm            | $\text{SCN}^- 10 \mu\text{g L}^{-1} + \text{Sample}$ | 4,3928                                               |                                                      |
|                                                                                                                     | <i>Chrysiptera parasema</i> |                             | S1bn            | $\text{SCN}^- 10 \mu\text{g L}^{-1} + \text{Sample}$ | 4,3865                                               |                                                      |
|                                                                                                                     | <i>Dascyllus sp.</i>        | -                           | S1bo            | $\text{SCN}^- 10 \mu\text{g L}^{-1} + \text{Sample}$ | 4,2701                                               |                                                      |

Supplementary Table S1 (continued)

| Chromatograms tested negative for SCN <sup>-</sup> * (For concentrations above 10 µg L <sup>-1</sup> SCN <sup>-</sup> ) |              |                                    |                             |                      |                                                 |                |
|-------------------------------------------------------------------------------------------------------------------------|--------------|------------------------------------|-----------------------------|----------------------|-------------------------------------------------|----------------|
| Family                                                                                                                  | Common name  | Species                            | Common name                 | Supplementary figure | Base Line                                       | Retention Time |
| <b>Pomacanthidae</b>                                                                                                    | Angelfishes  | <i>Pomacentrus alleni</i>          | Allen's damselfish          | S1o                  | SCN <sup>-</sup> 10 µg L <sup>-1</sup> + Sample | 4,2274         |
|                                                                                                                         |              | <i>Pomacentrus alleni</i>          |                             | S1p                  | SCN <sup>-</sup> 10 µg L <sup>-1</sup> + Sample | 4,2297         |
|                                                                                                                         |              | <i>Centropyge acanthops</i>        | African flameback angelfish | S1q                  | SCN <sup>-</sup> 10 µg L <sup>-1</sup> + Sample | 4,1345         |
|                                                                                                                         |              | <i>Pygoplites diacanthus</i>       | Regal angelfishes           | S1r                  | SCN <sup>-</sup> 10 µg L <sup>-1</sup> + Sample | 4,1445         |
|                                                                                                                         |              | <i>Centropyge bispinosa</i>        | Coral beauty                | S1z                  | SCN <sup>-</sup> 10 µg L <sup>-1</sup> + Sample | 4,6817         |
|                                                                                                                         |              | <i>Centropyge bicolor</i>          | Bicolor angelfish           | S1bb                 | SCN <sup>-</sup> 10 µg L <sup>-1</sup> + Sample | 4,2867         |
|                                                                                                                         |              | <i>Centropyge bicolor</i>          |                             | S1bc                 | SCN <sup>-</sup> 10 µg L <sup>-1</sup> + Sample | 4,2952         |
|                                                                                                                         |              | <i>Centropyge bicolor</i>          |                             | S1bd                 | SCN <sup>-</sup> 10 µg L <sup>-1</sup> + Sample | 4,3077         |
| <b>Scaridae</b>                                                                                                         | Parrotfishes | <i>Scarus quoyi</i>                | Quoy's parrotfish           | S1bp                 | SCN <sup>-</sup> 10 µg L <sup>-1</sup> + Sample | 4,2551         |
| <b>Serranidae</b>                                                                                                       | Anthias      | <i>Pseudanthias squamipinnis</i>   | Lyretail anthias            | S1bq                 | SCN <sup>-</sup> 10 µg L <sup>-1</sup> + Sample | 4,3210         |
|                                                                                                                         |              | <i>Pseudanthias squamipinnis</i>   |                             | S1br                 | SCN <sup>-</sup> 10 µg L <sup>-1</sup> + Sample | 4,3190         |
|                                                                                                                         |              | <i>Pseudanthias squamipinnis</i>   |                             | S1bs                 | SCN <sup>-</sup> 10 µg L <sup>-1</sup> + Sample | 4,2700         |
| <b>Siganidae</b>                                                                                                        | Rabbitfishes | <i>Siganus vulpinus</i>            | Foxface rabbitfish          | S1bt                 | SCN <sup>-</sup> 10 µg L <sup>-1</sup> + Sample | 4,3525         |
|                                                                                                                         |              | <i>Siganus vulpinus</i>            |                             | S1bu                 | SCN <sup>-</sup> 10 µg L <sup>-1</sup> + Sample | 4,2123         |
| <b>Syngnathidae</b>                                                                                                     | Pipefishes   | <i>Corythoichthys intestinalis</i> | Messmate pipefish           | S1ak                 | SCN <sup>-</sup> 10 µg L <sup>-1</sup> + Sample | 4,2409         |
| <b>Tetraodontidae</b>                                                                                                   | Pufferfishes | <i>Arothron hispidus</i>           | Whitespotted                | S1al                 | SCN <sup>-</sup> 10 µg L <sup>-1</sup> + Sample | 4,1767         |
|                                                                                                                         |              | <i>Canthigaster valentini</i>      | Saddled toby                | S1bv                 | SCN <sup>-</sup> 10 µg L <sup>-1</sup> + Sample | 4,5102         |
|                                                                                                                         |              |                                    |                             |                      | <b>Average (from all negatives)</b>             | <b>4,3122</b>  |
|                                                                                                                         |              |                                    |                             |                      | Max value                                       | 5,0090         |
|                                                                                                                         |              |                                    |                             |                      | Min value                                       | 3,9321         |

**Supplementary Table S2** – Synthetic seawater volume employed to depurate selected fish according to their total length (measured from the tip of the snout to the tip of the longer lobe of the caudal fin).

| <b>Fish total length (TL)</b><br><b>(mm)</b> | <b>Seawater volume</b><br><b>(ml)</b> |
|----------------------------------------------|---------------------------------------|
| TL < 1,5                                     | 500                                   |
| 1,5 < TL > 3                                 | 1000                                  |
| 3 < TL > 5                                   | 1500                                  |
| 5 < TL > 10                                  | 2000                                  |
| 10 < TL > 20                                 | 5000                                  |
